# Supplementary material
Source: ML conference proceedings conference paper supplement (https://openreview.net/forum?id=sG6gjpaOIJ)

scores training

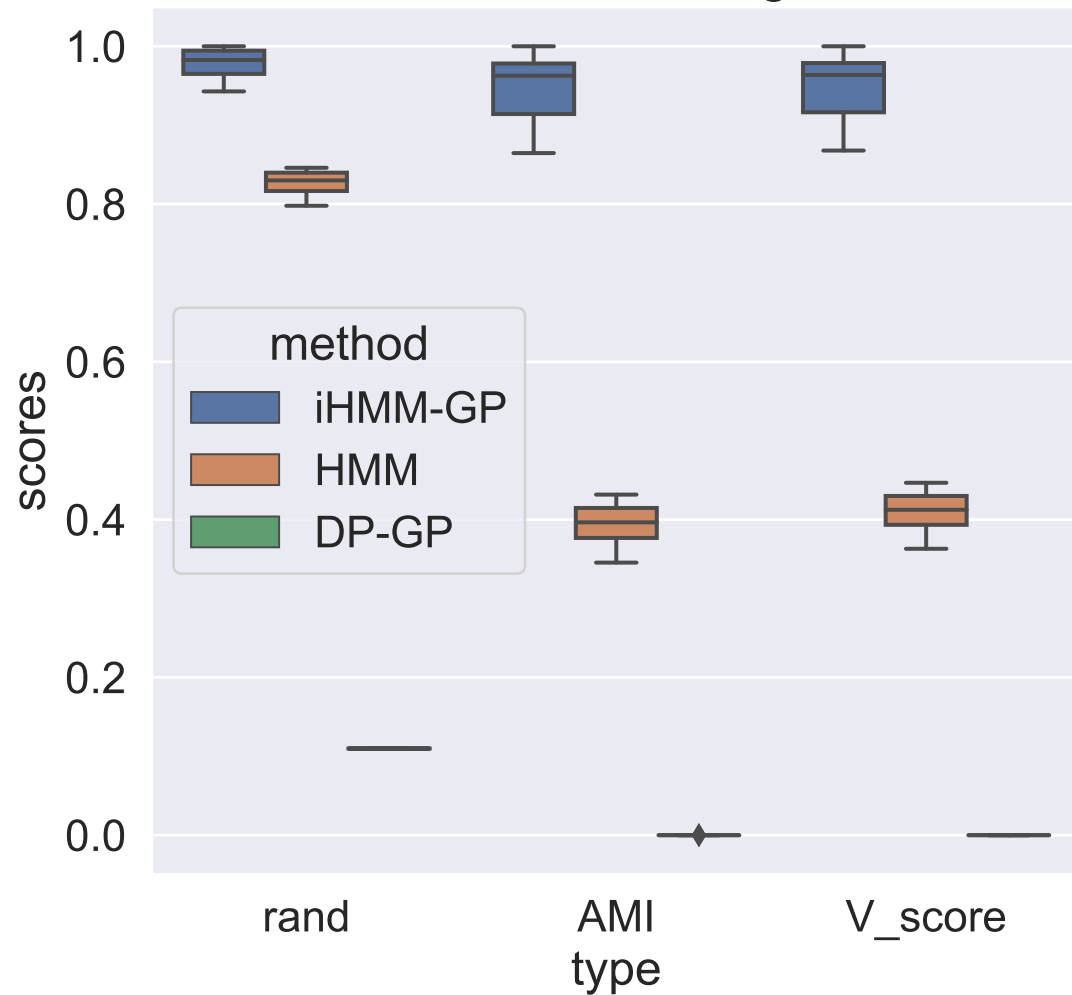

scores test

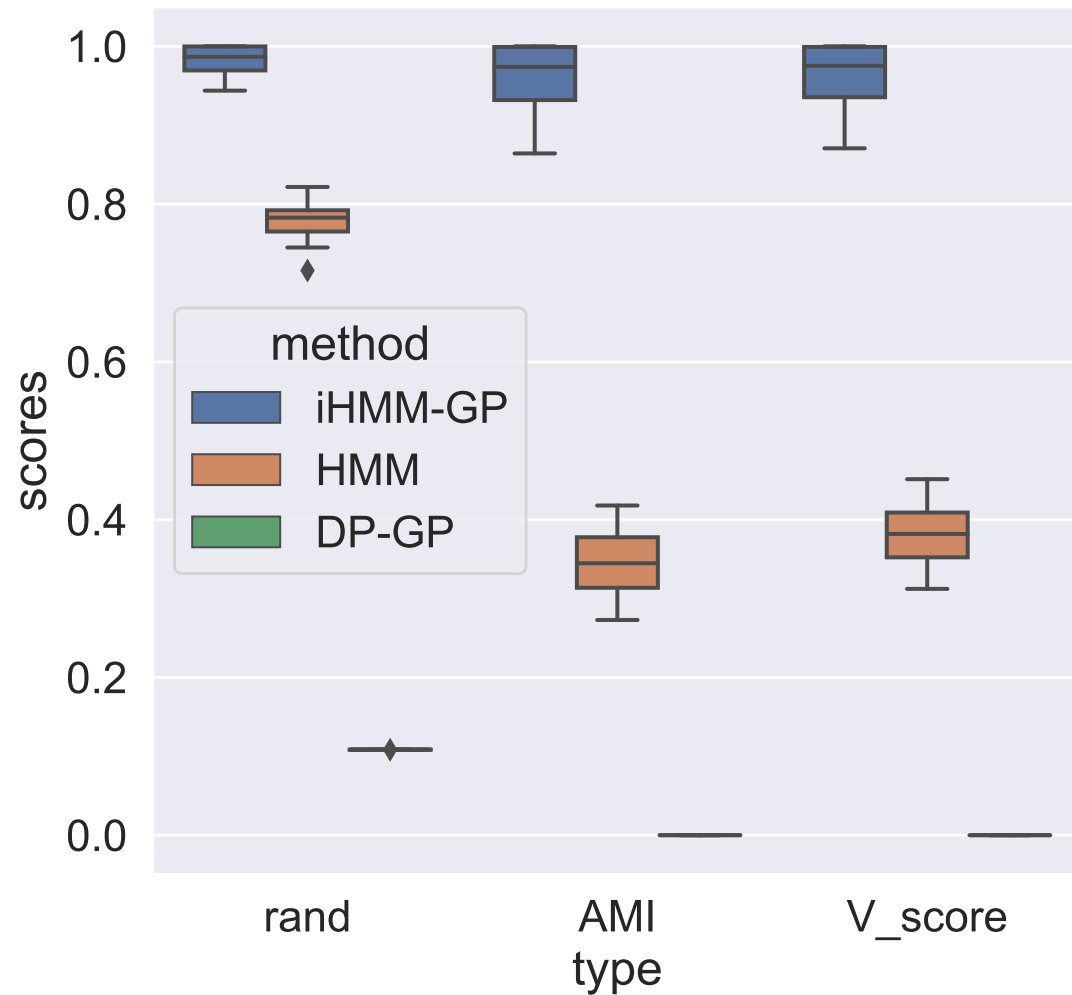

Supplement: supplementary_material [file attachment]

Eg 1:  $t=427$

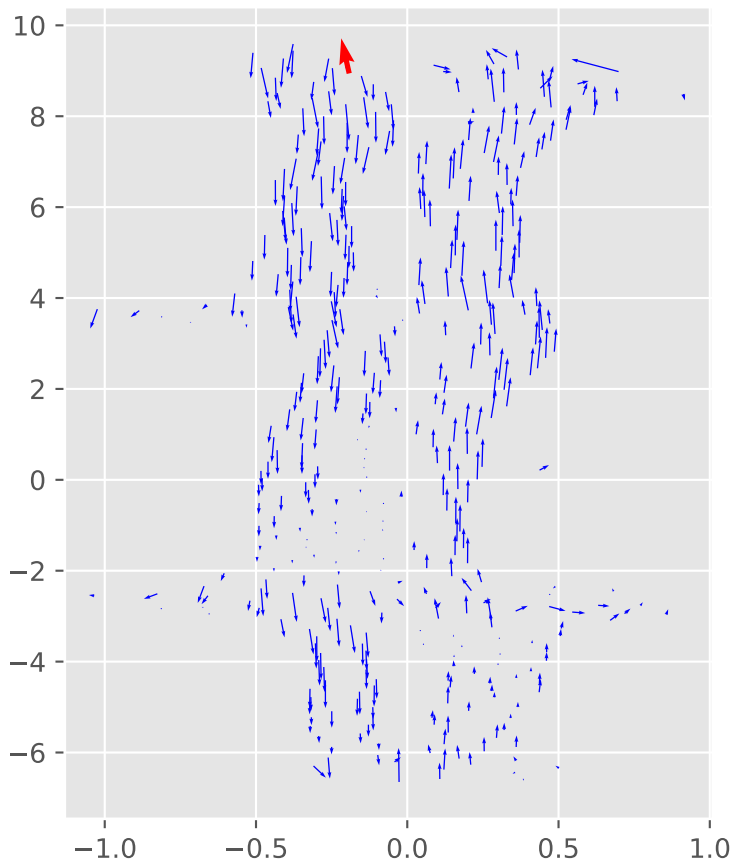

Eg 2:  $t=577$

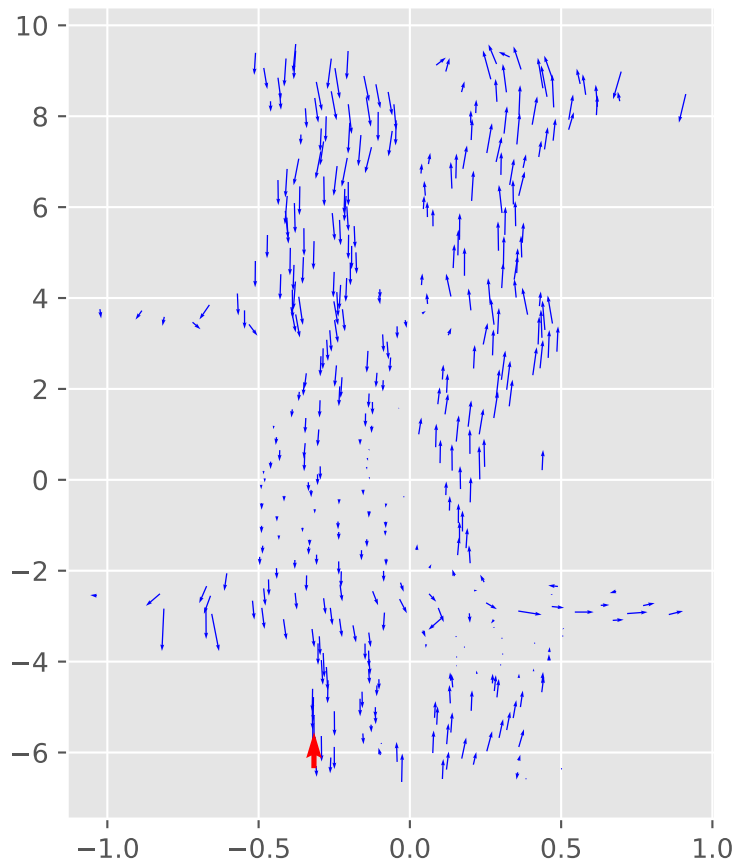

Supplement: supplementary_material [file attachment]

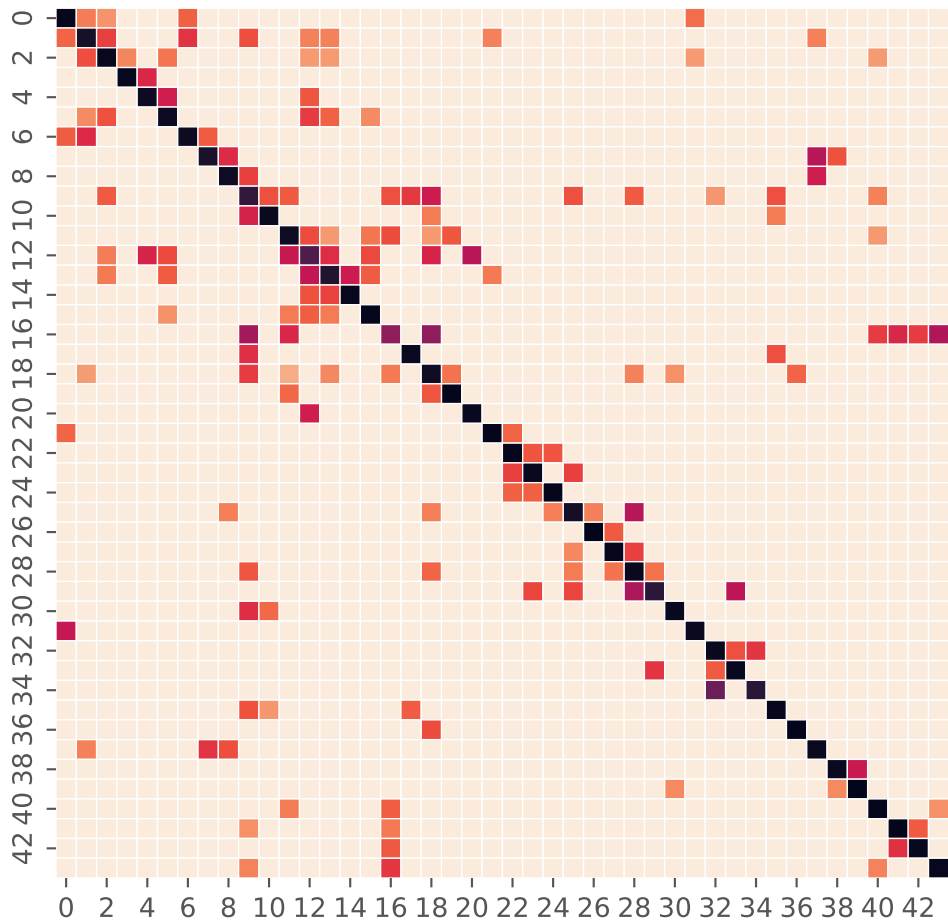

Supplement: supplementary_material [file attachment]

time

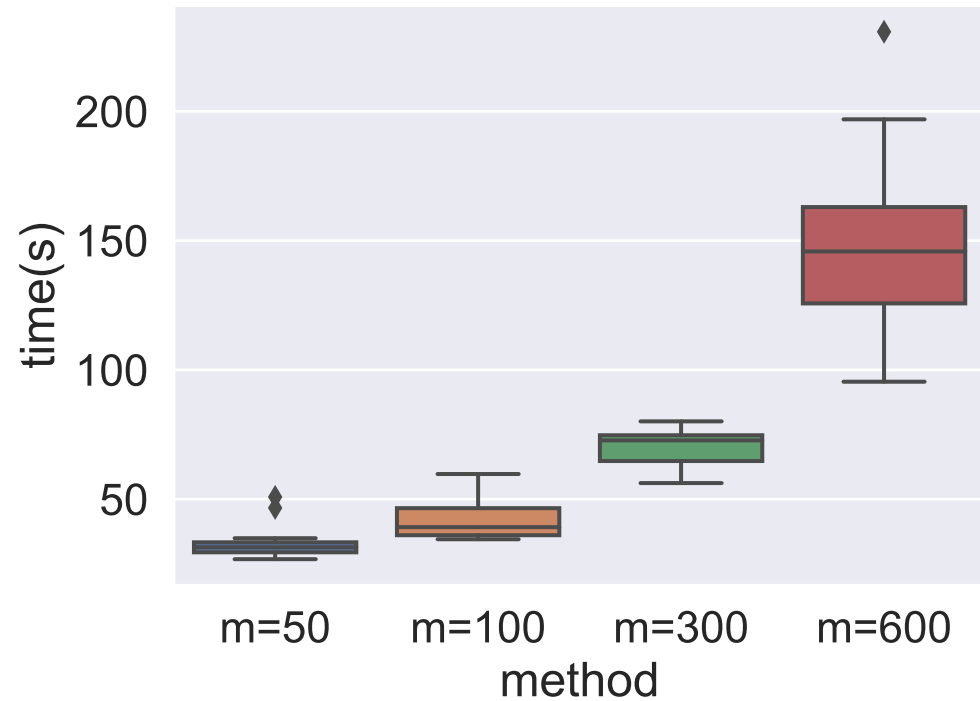

scores

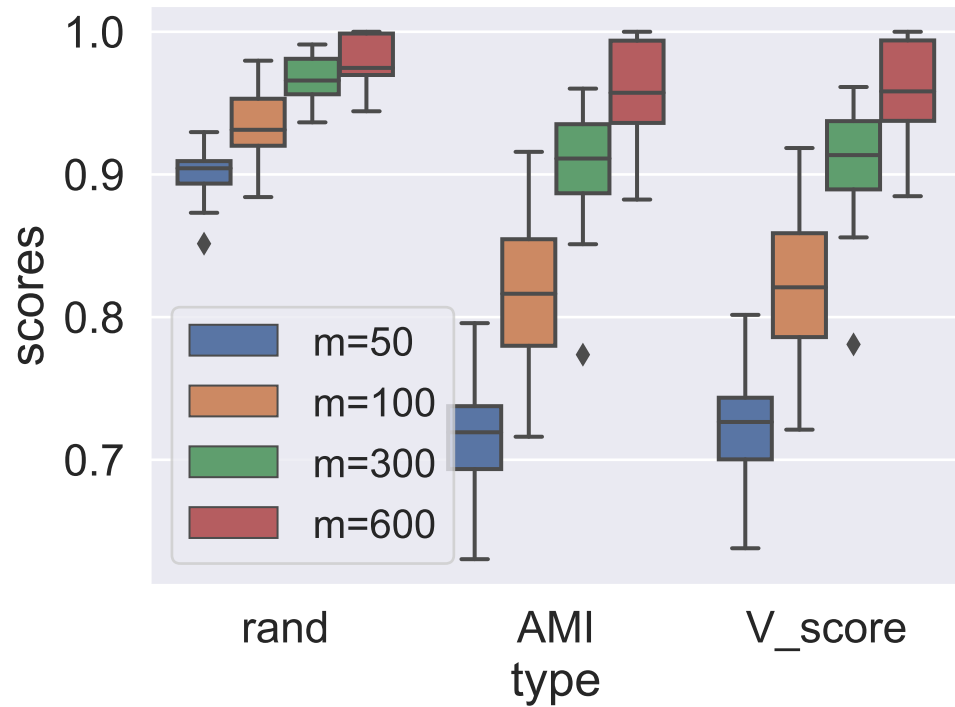

Supplement: supplementary_material [file attachment]

single

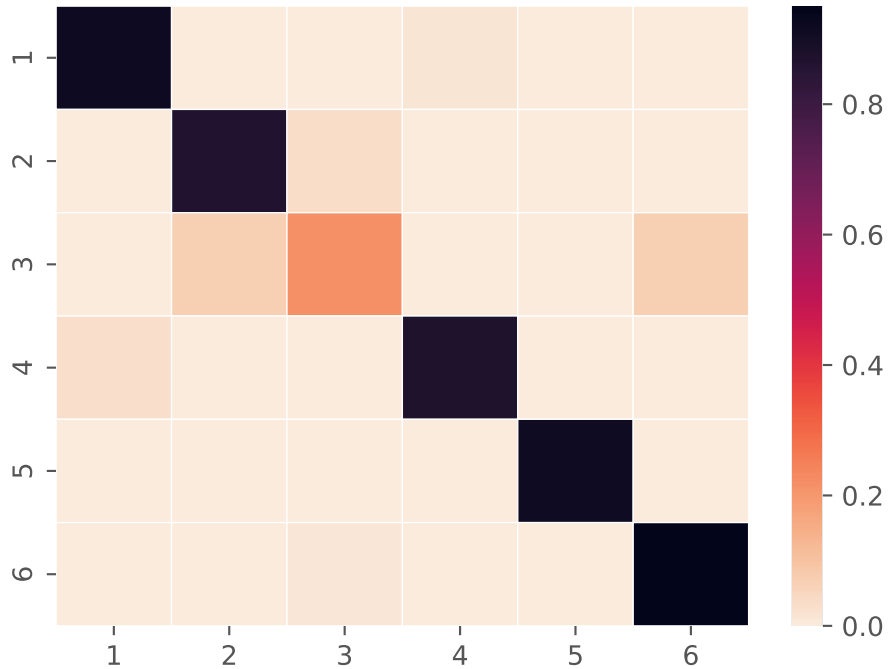

1200 steps

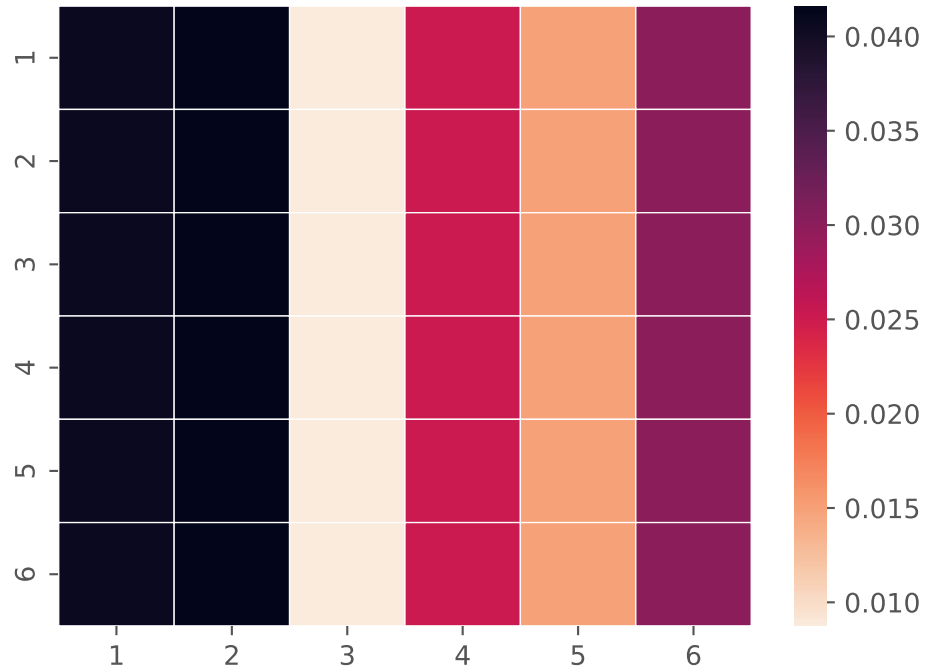

Supplement: supplementary_material [file attachment]

inf norm

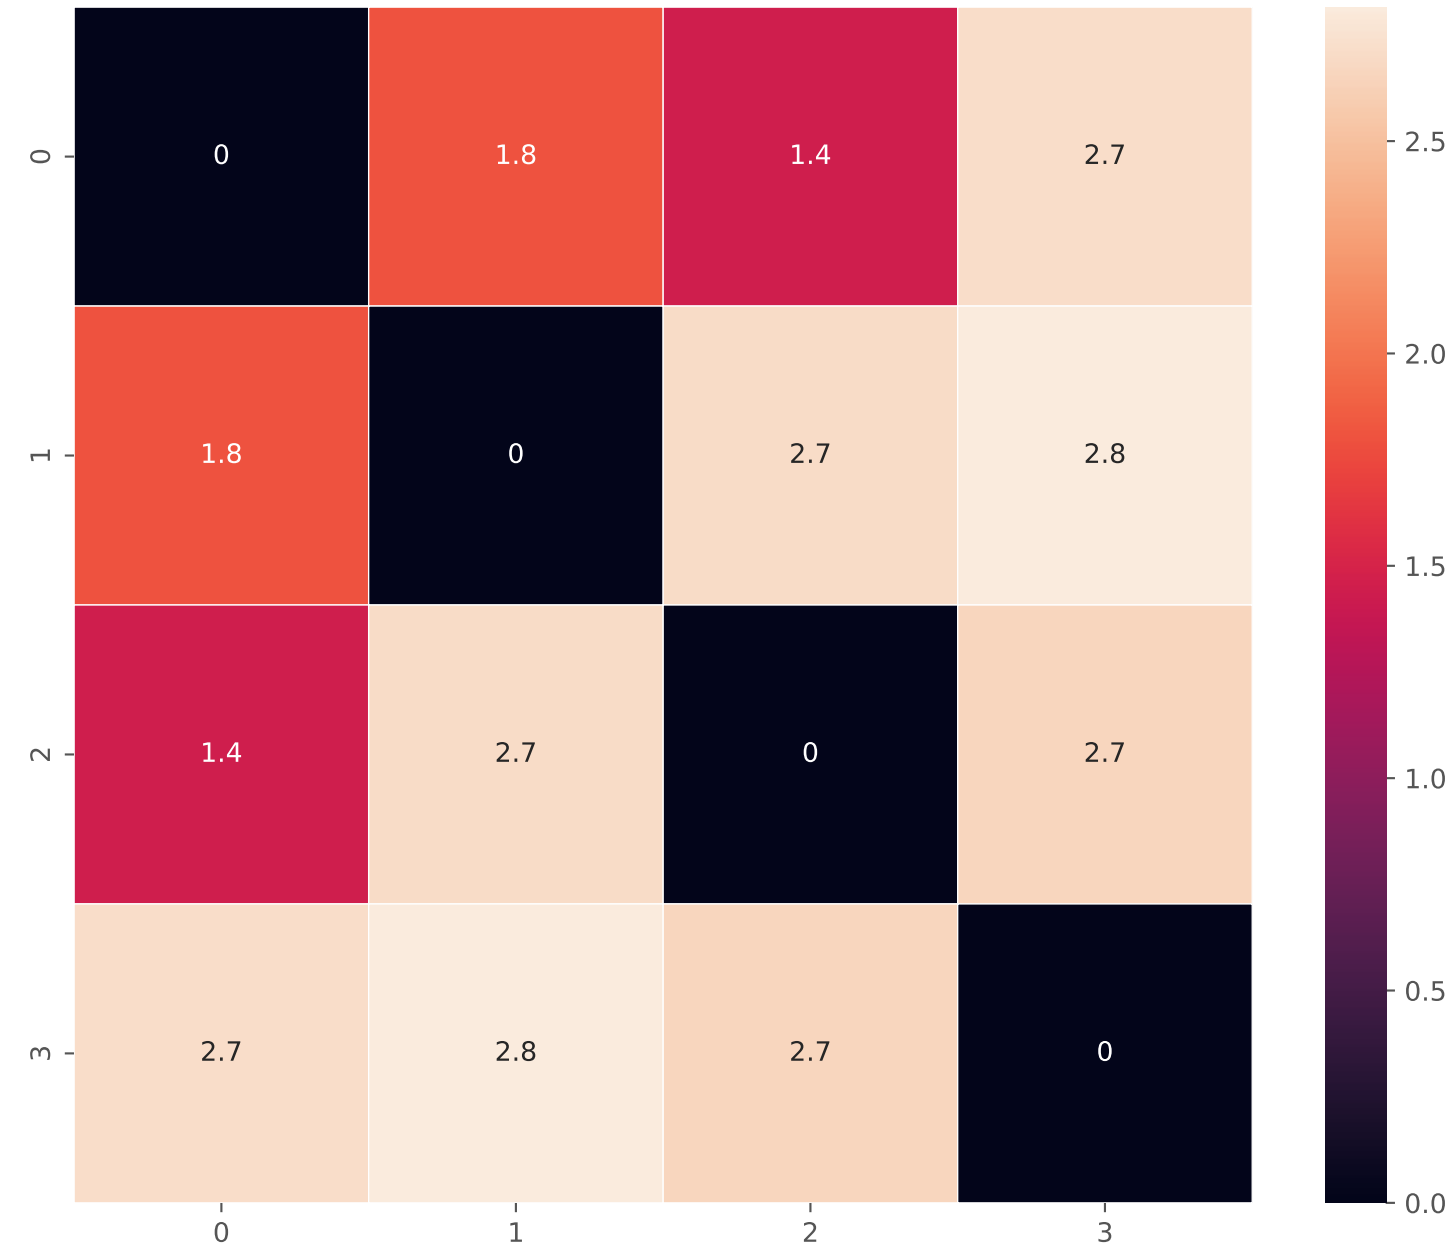

L2 norm

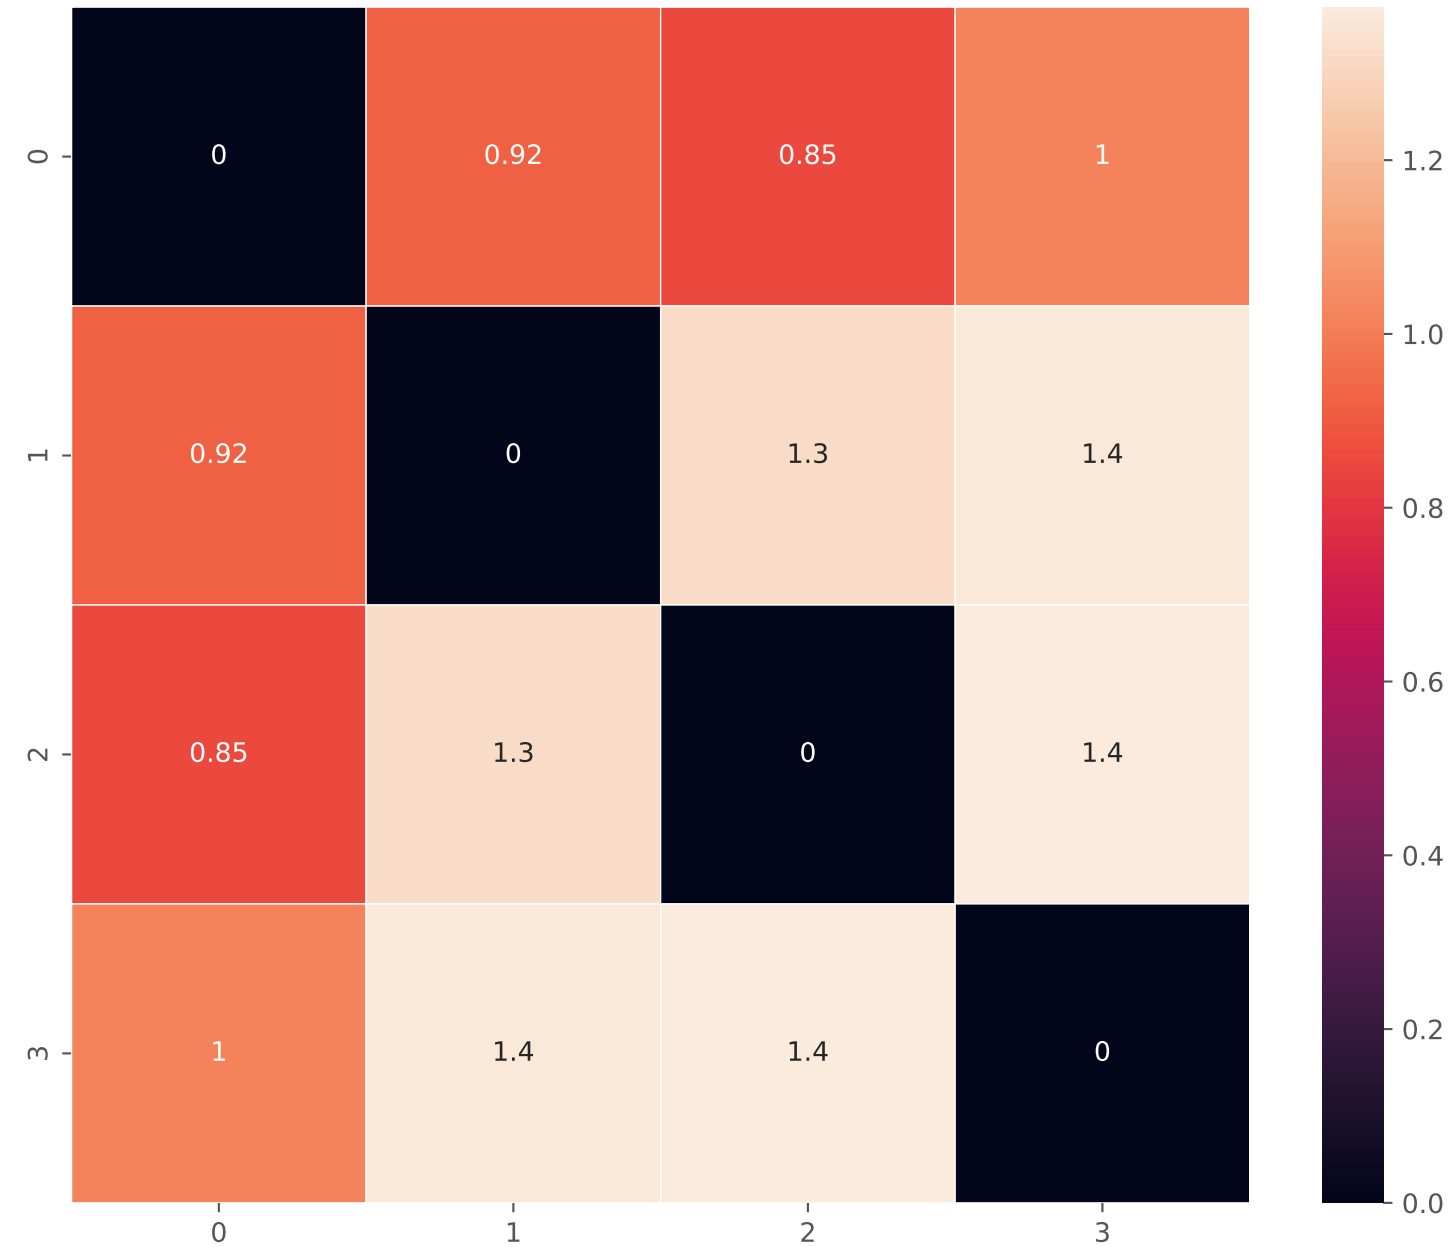

Supplement: supplementary_material [file attachment]

scores training

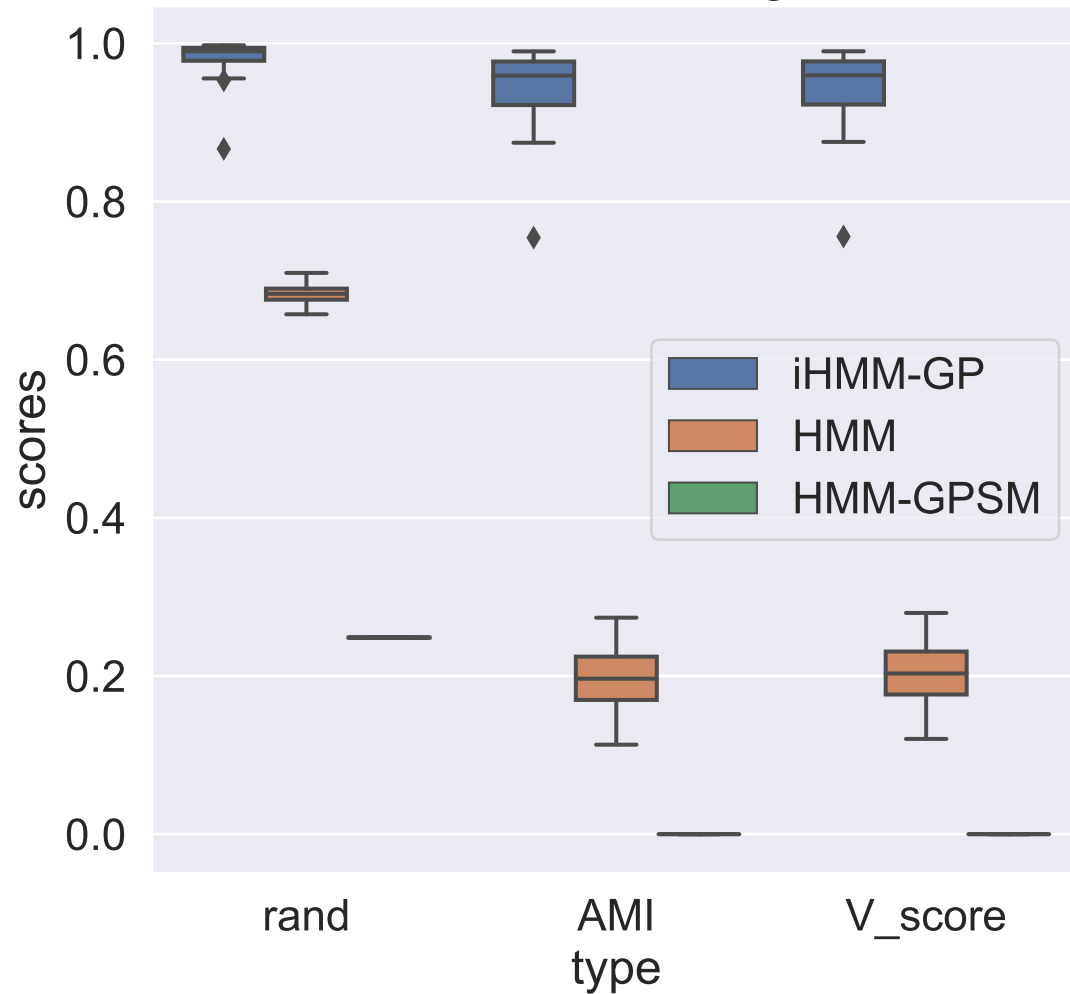

scores test

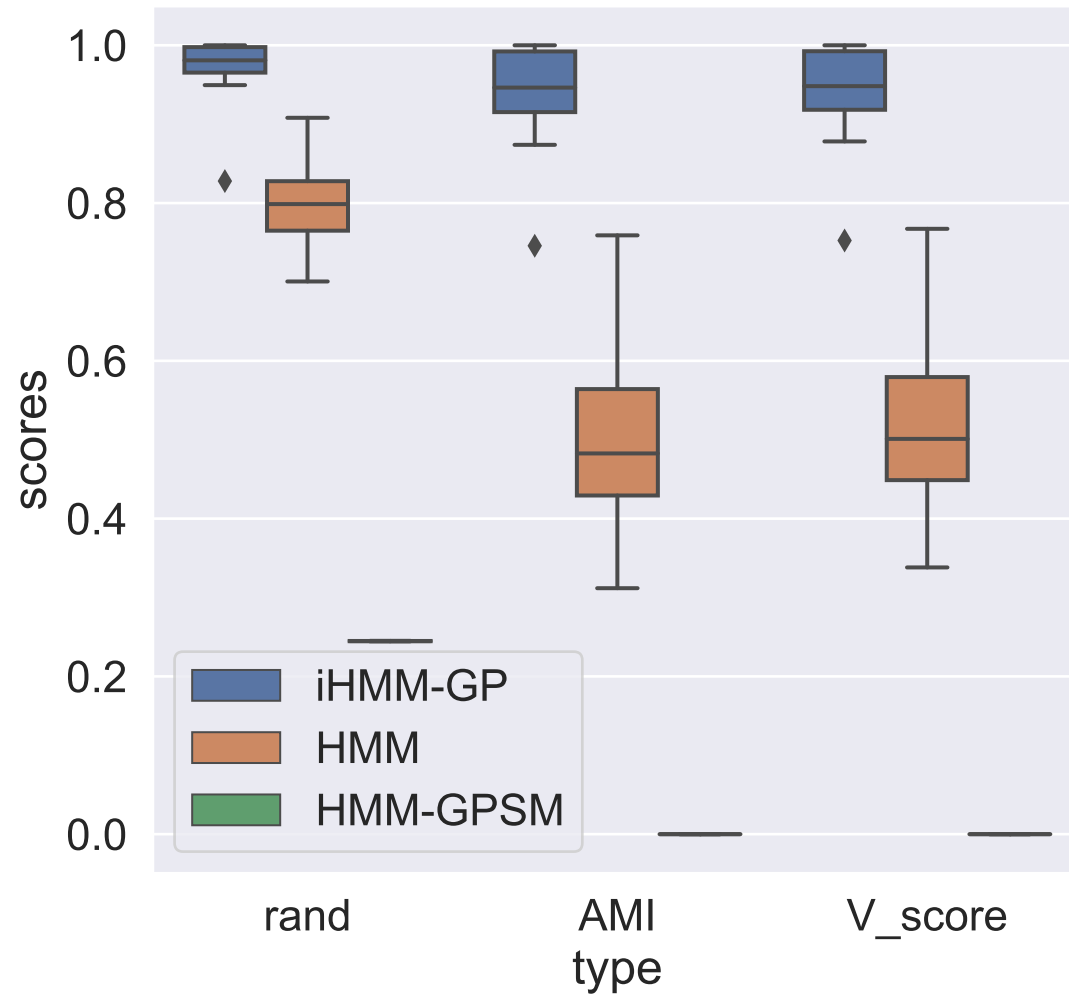

Supplement: supplementary_material [file attachment]

time

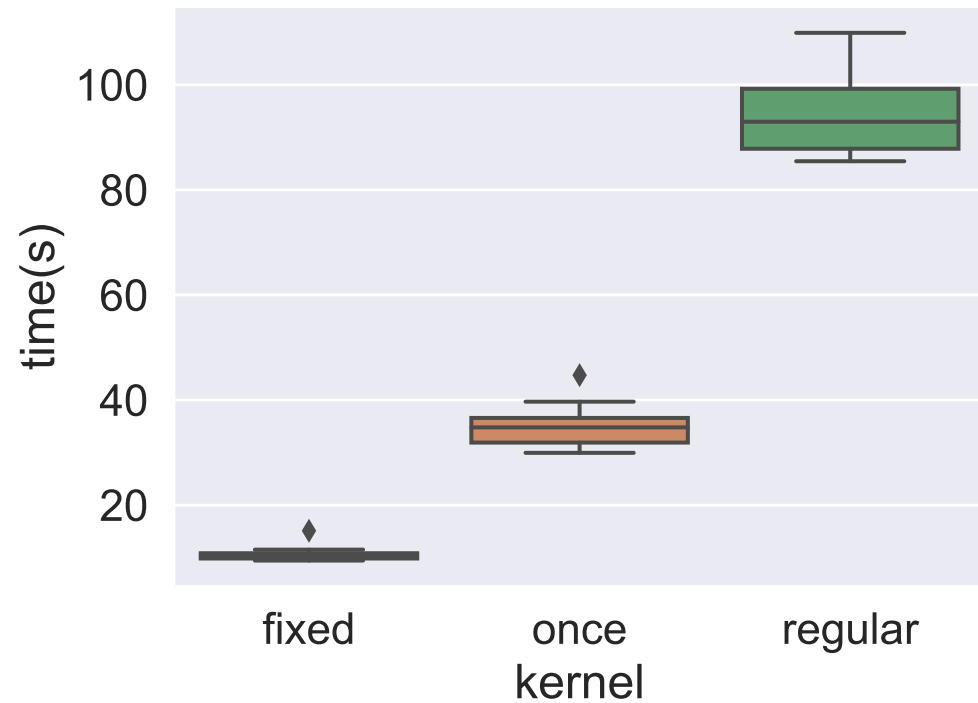

scores

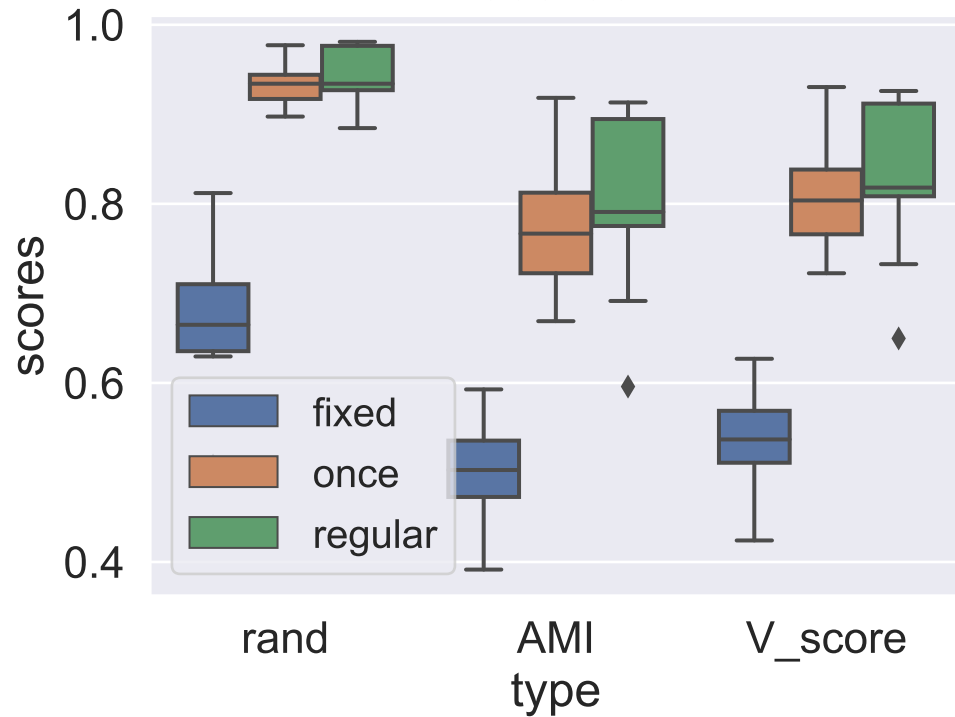

Supplement: supplementary_material [file attachment]

f4 (type 1)

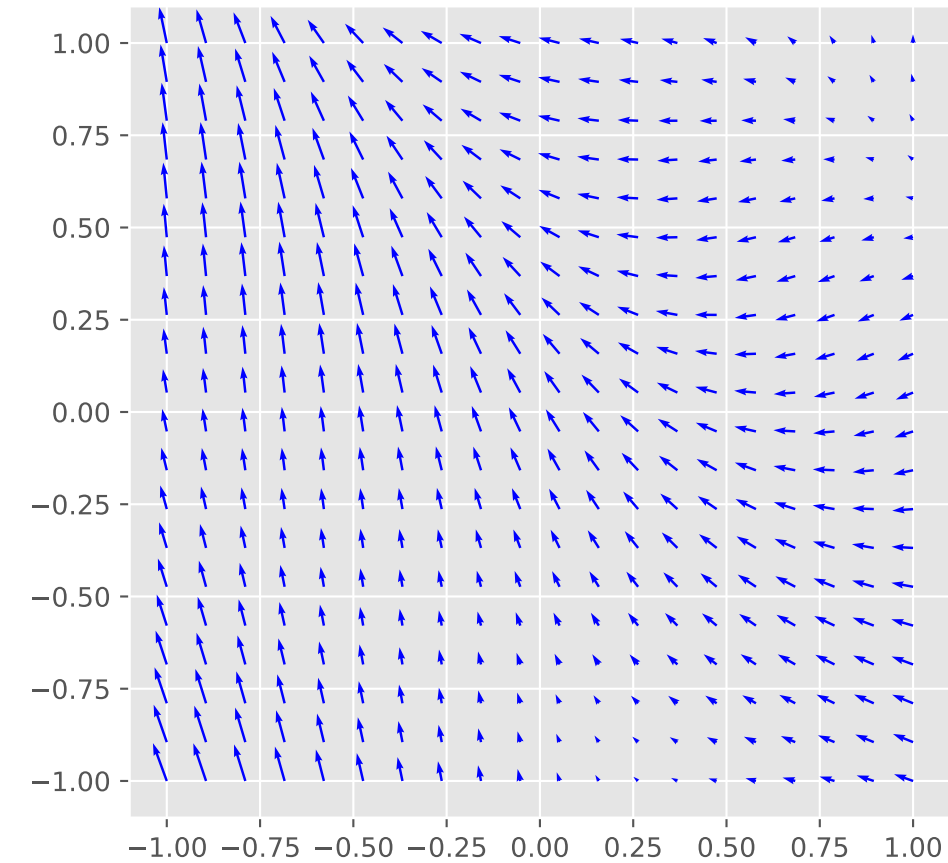

f7 (type 3)

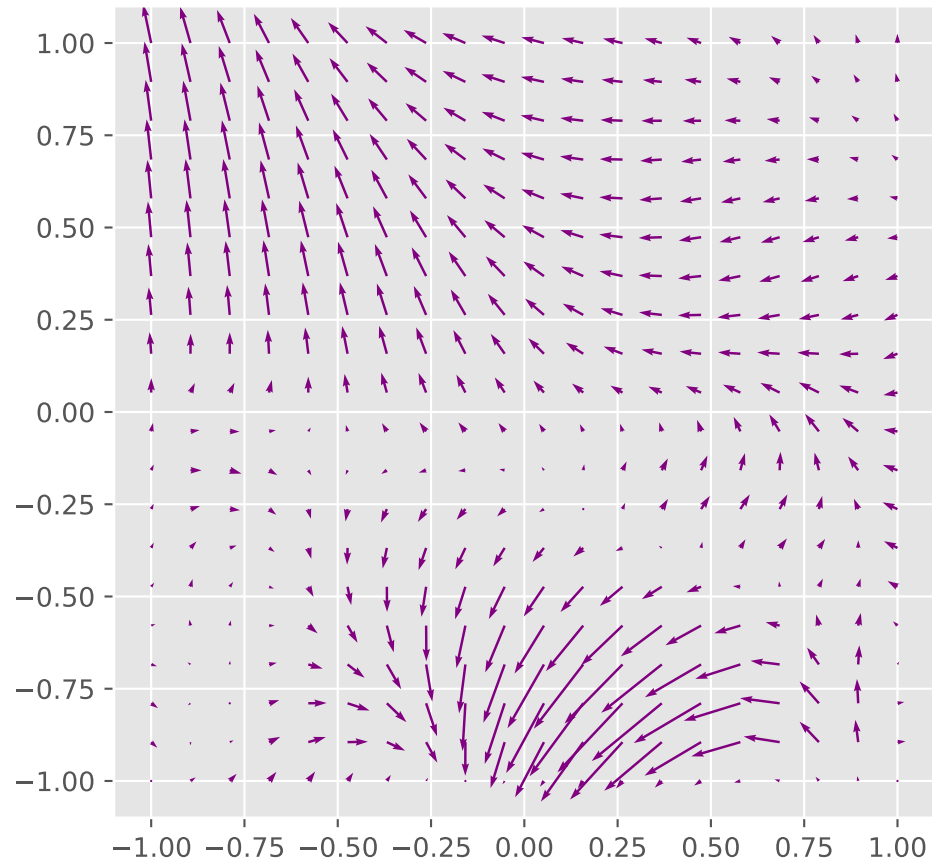

f1 (type 2)

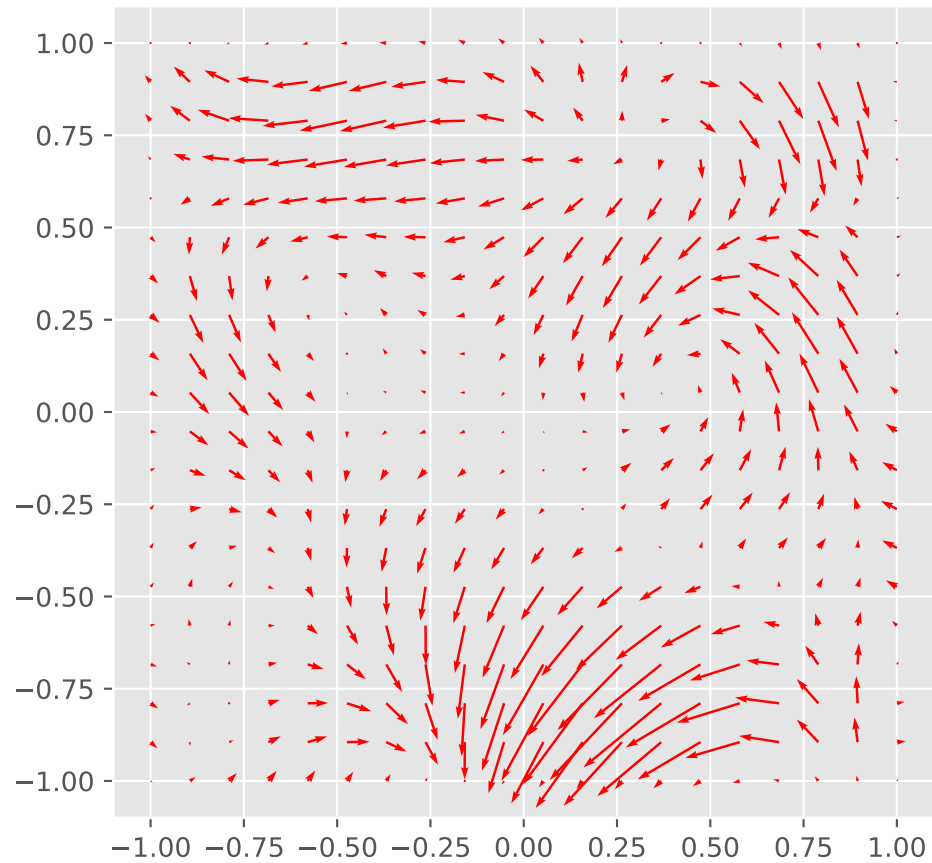

Supplement: supplementary_material [file attachment]

t=1

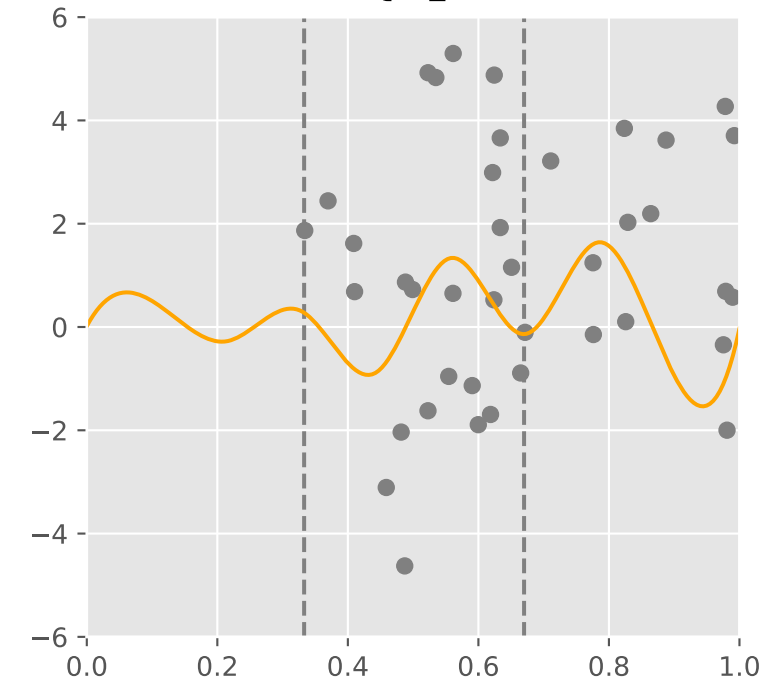

t=2

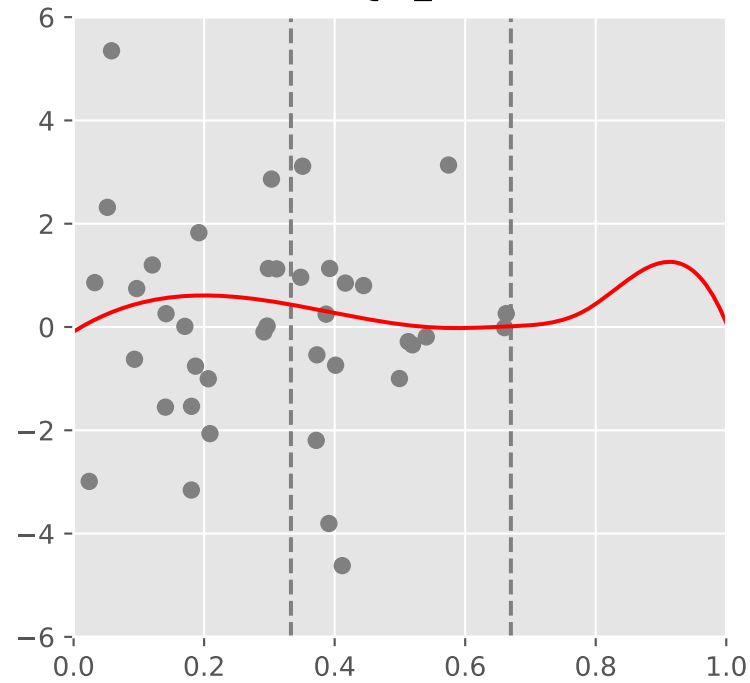

t=3

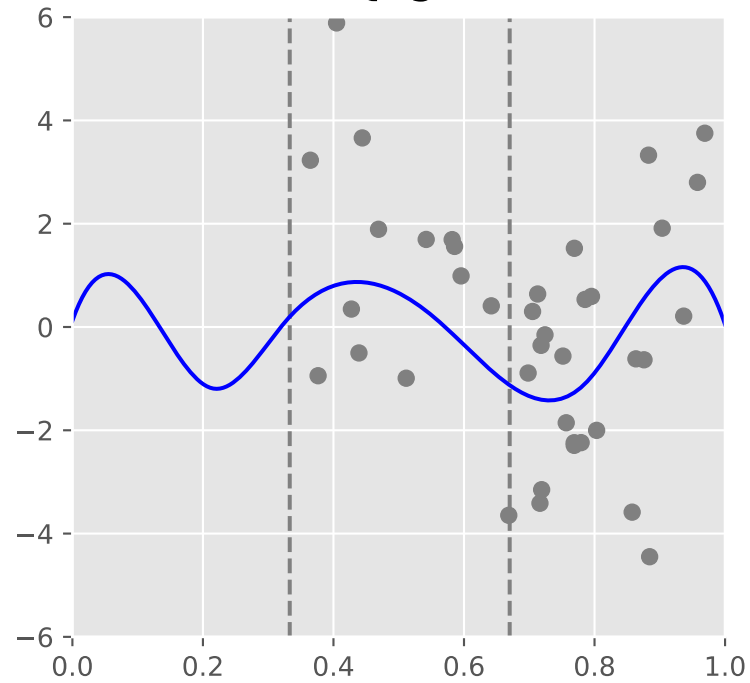

t=4

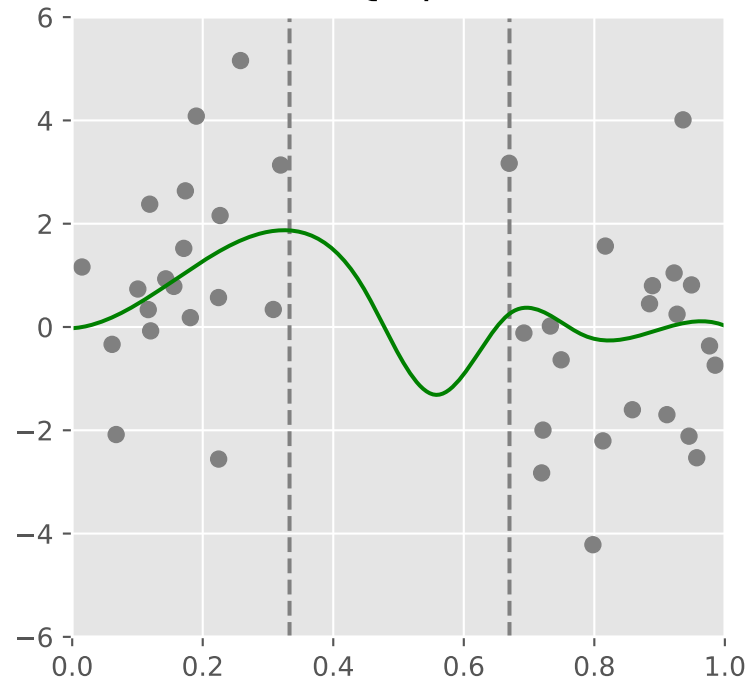

Supplement: supplementary_material [file attachment]

Eg 1:  $t=427$

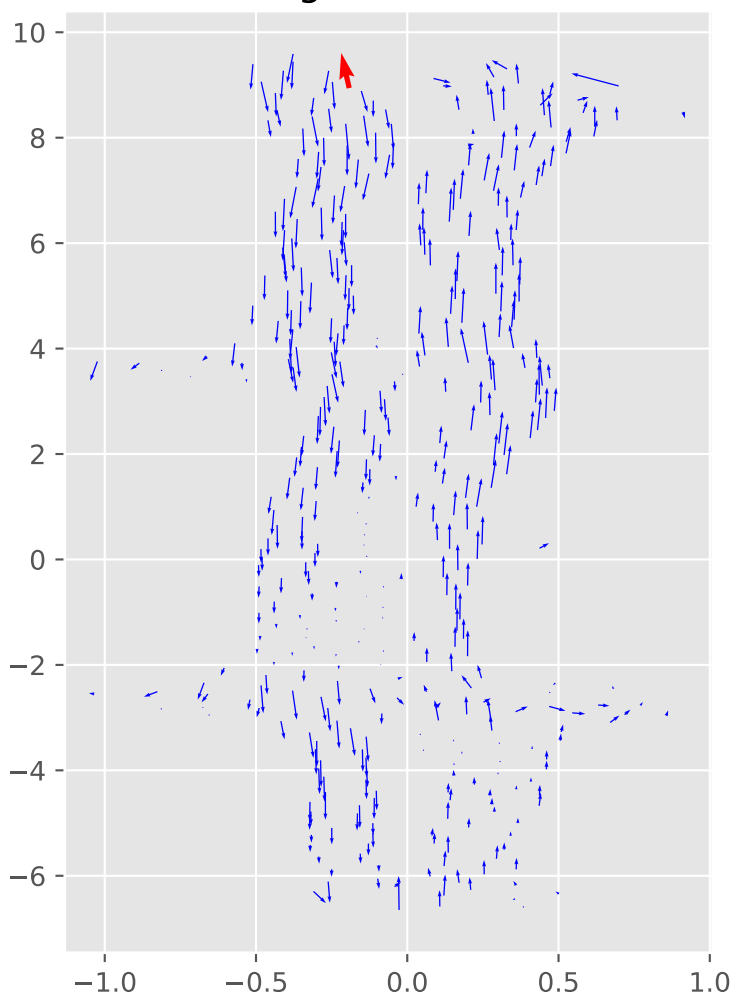

Eg 2:  $t=577$

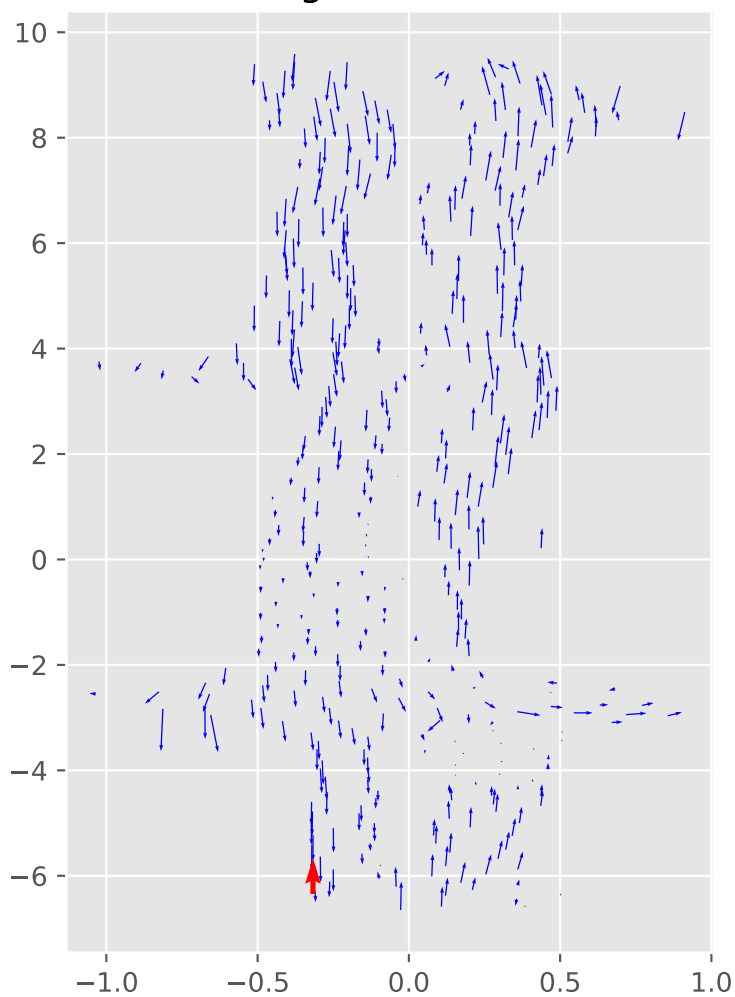

Eg 3:  $t=989$

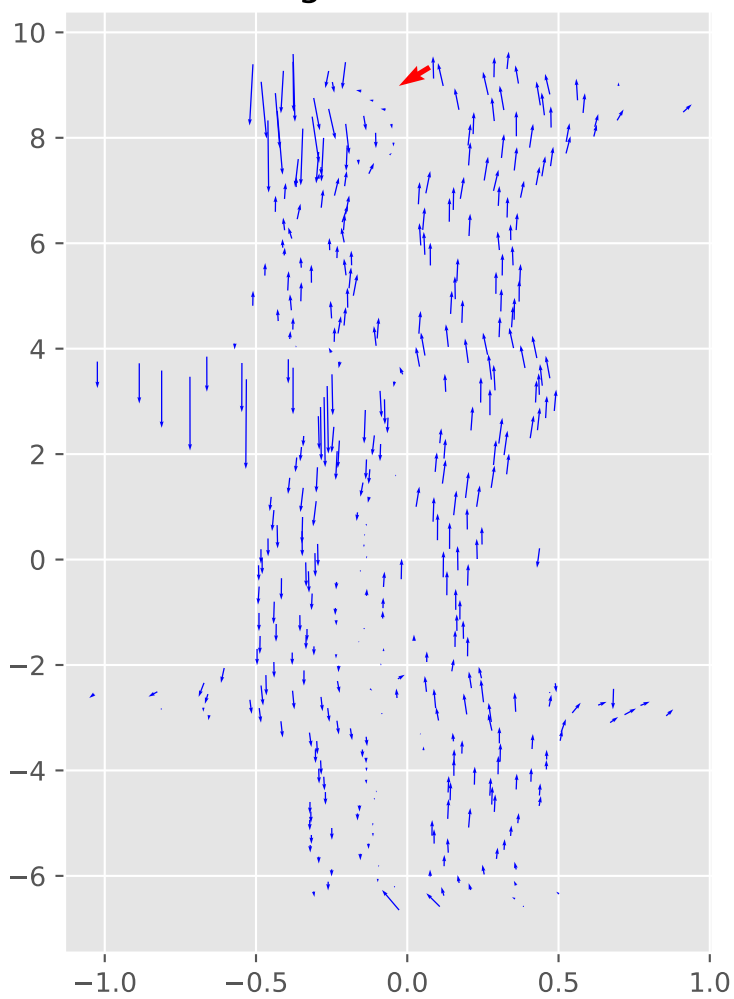

Eg 4:  $t=1699$

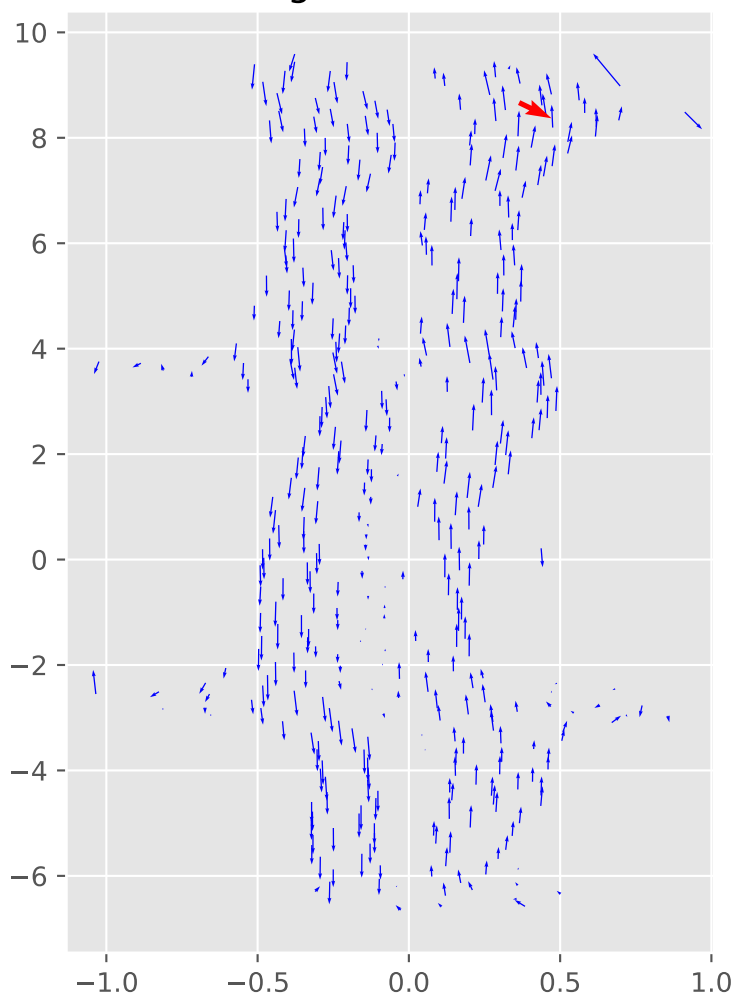

Supplement: supplementary_material [file attachment]

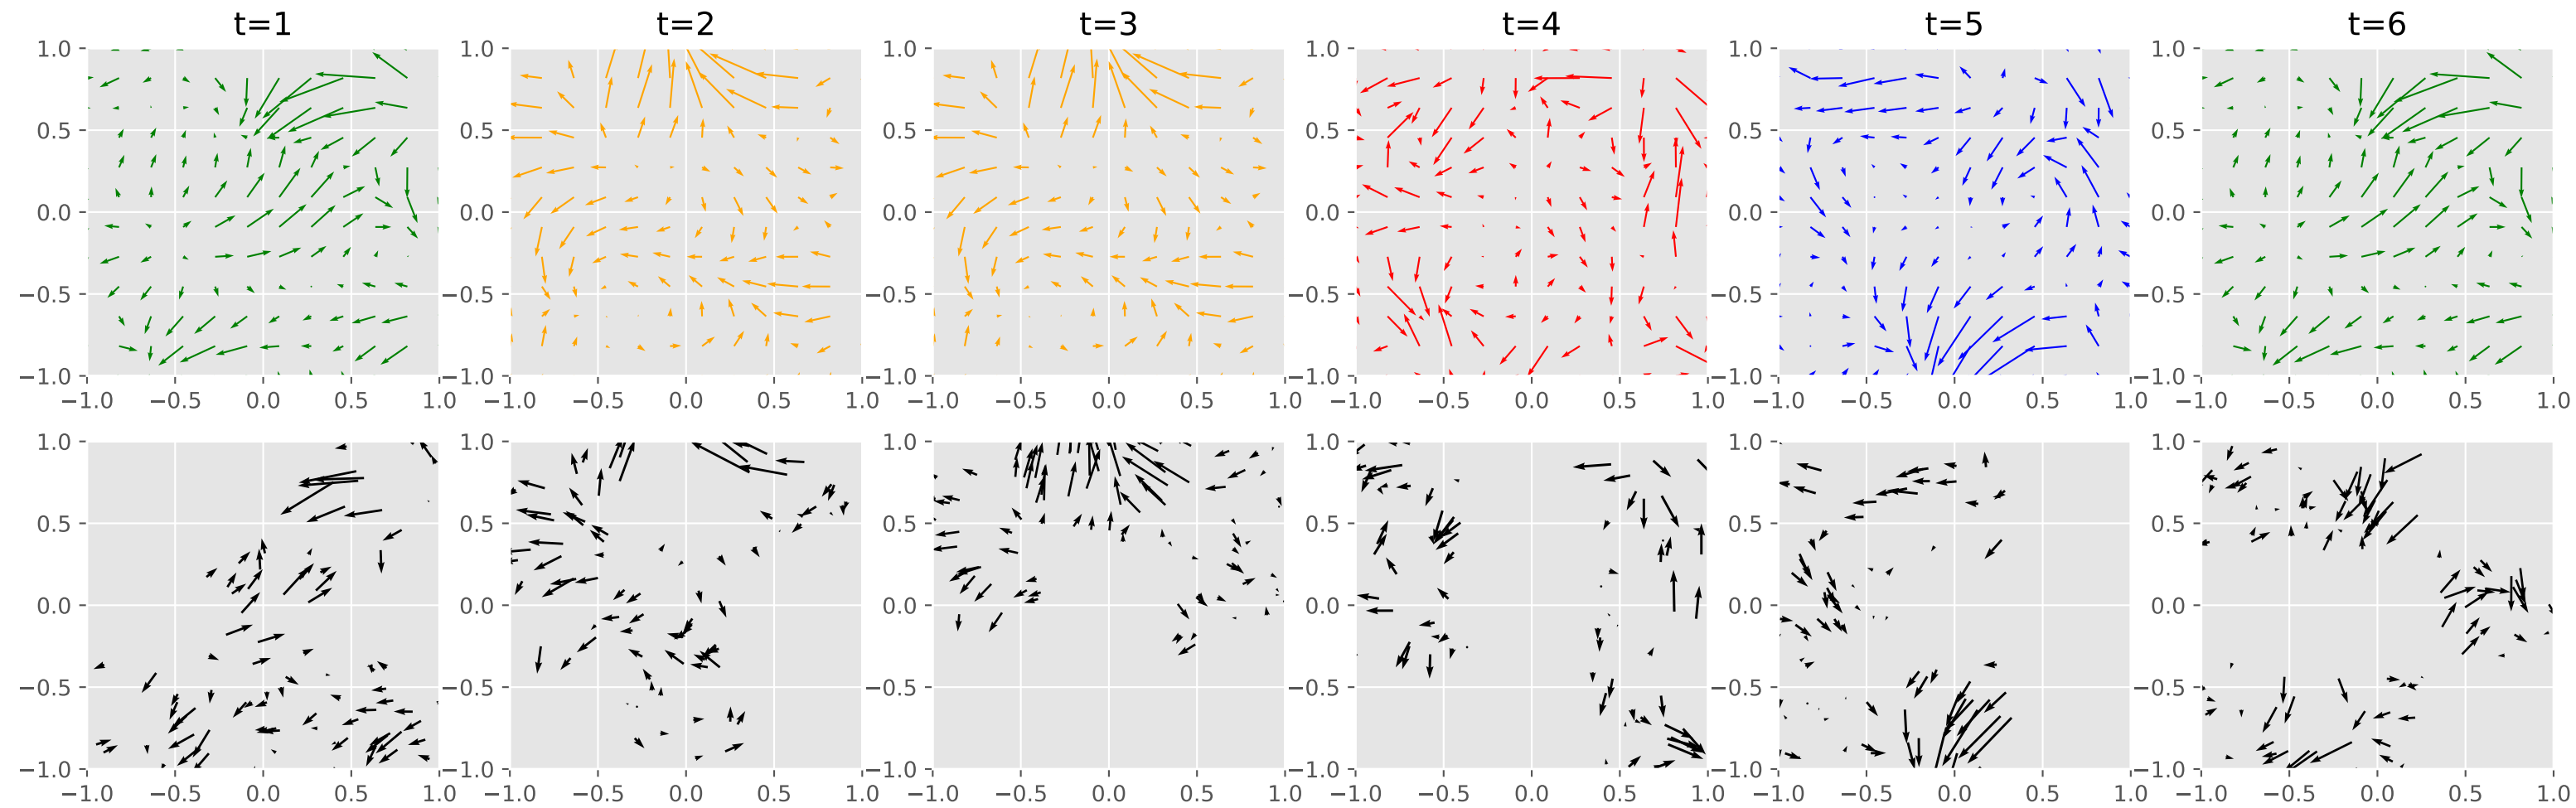

Supplement: supplementary_material [file attachment]

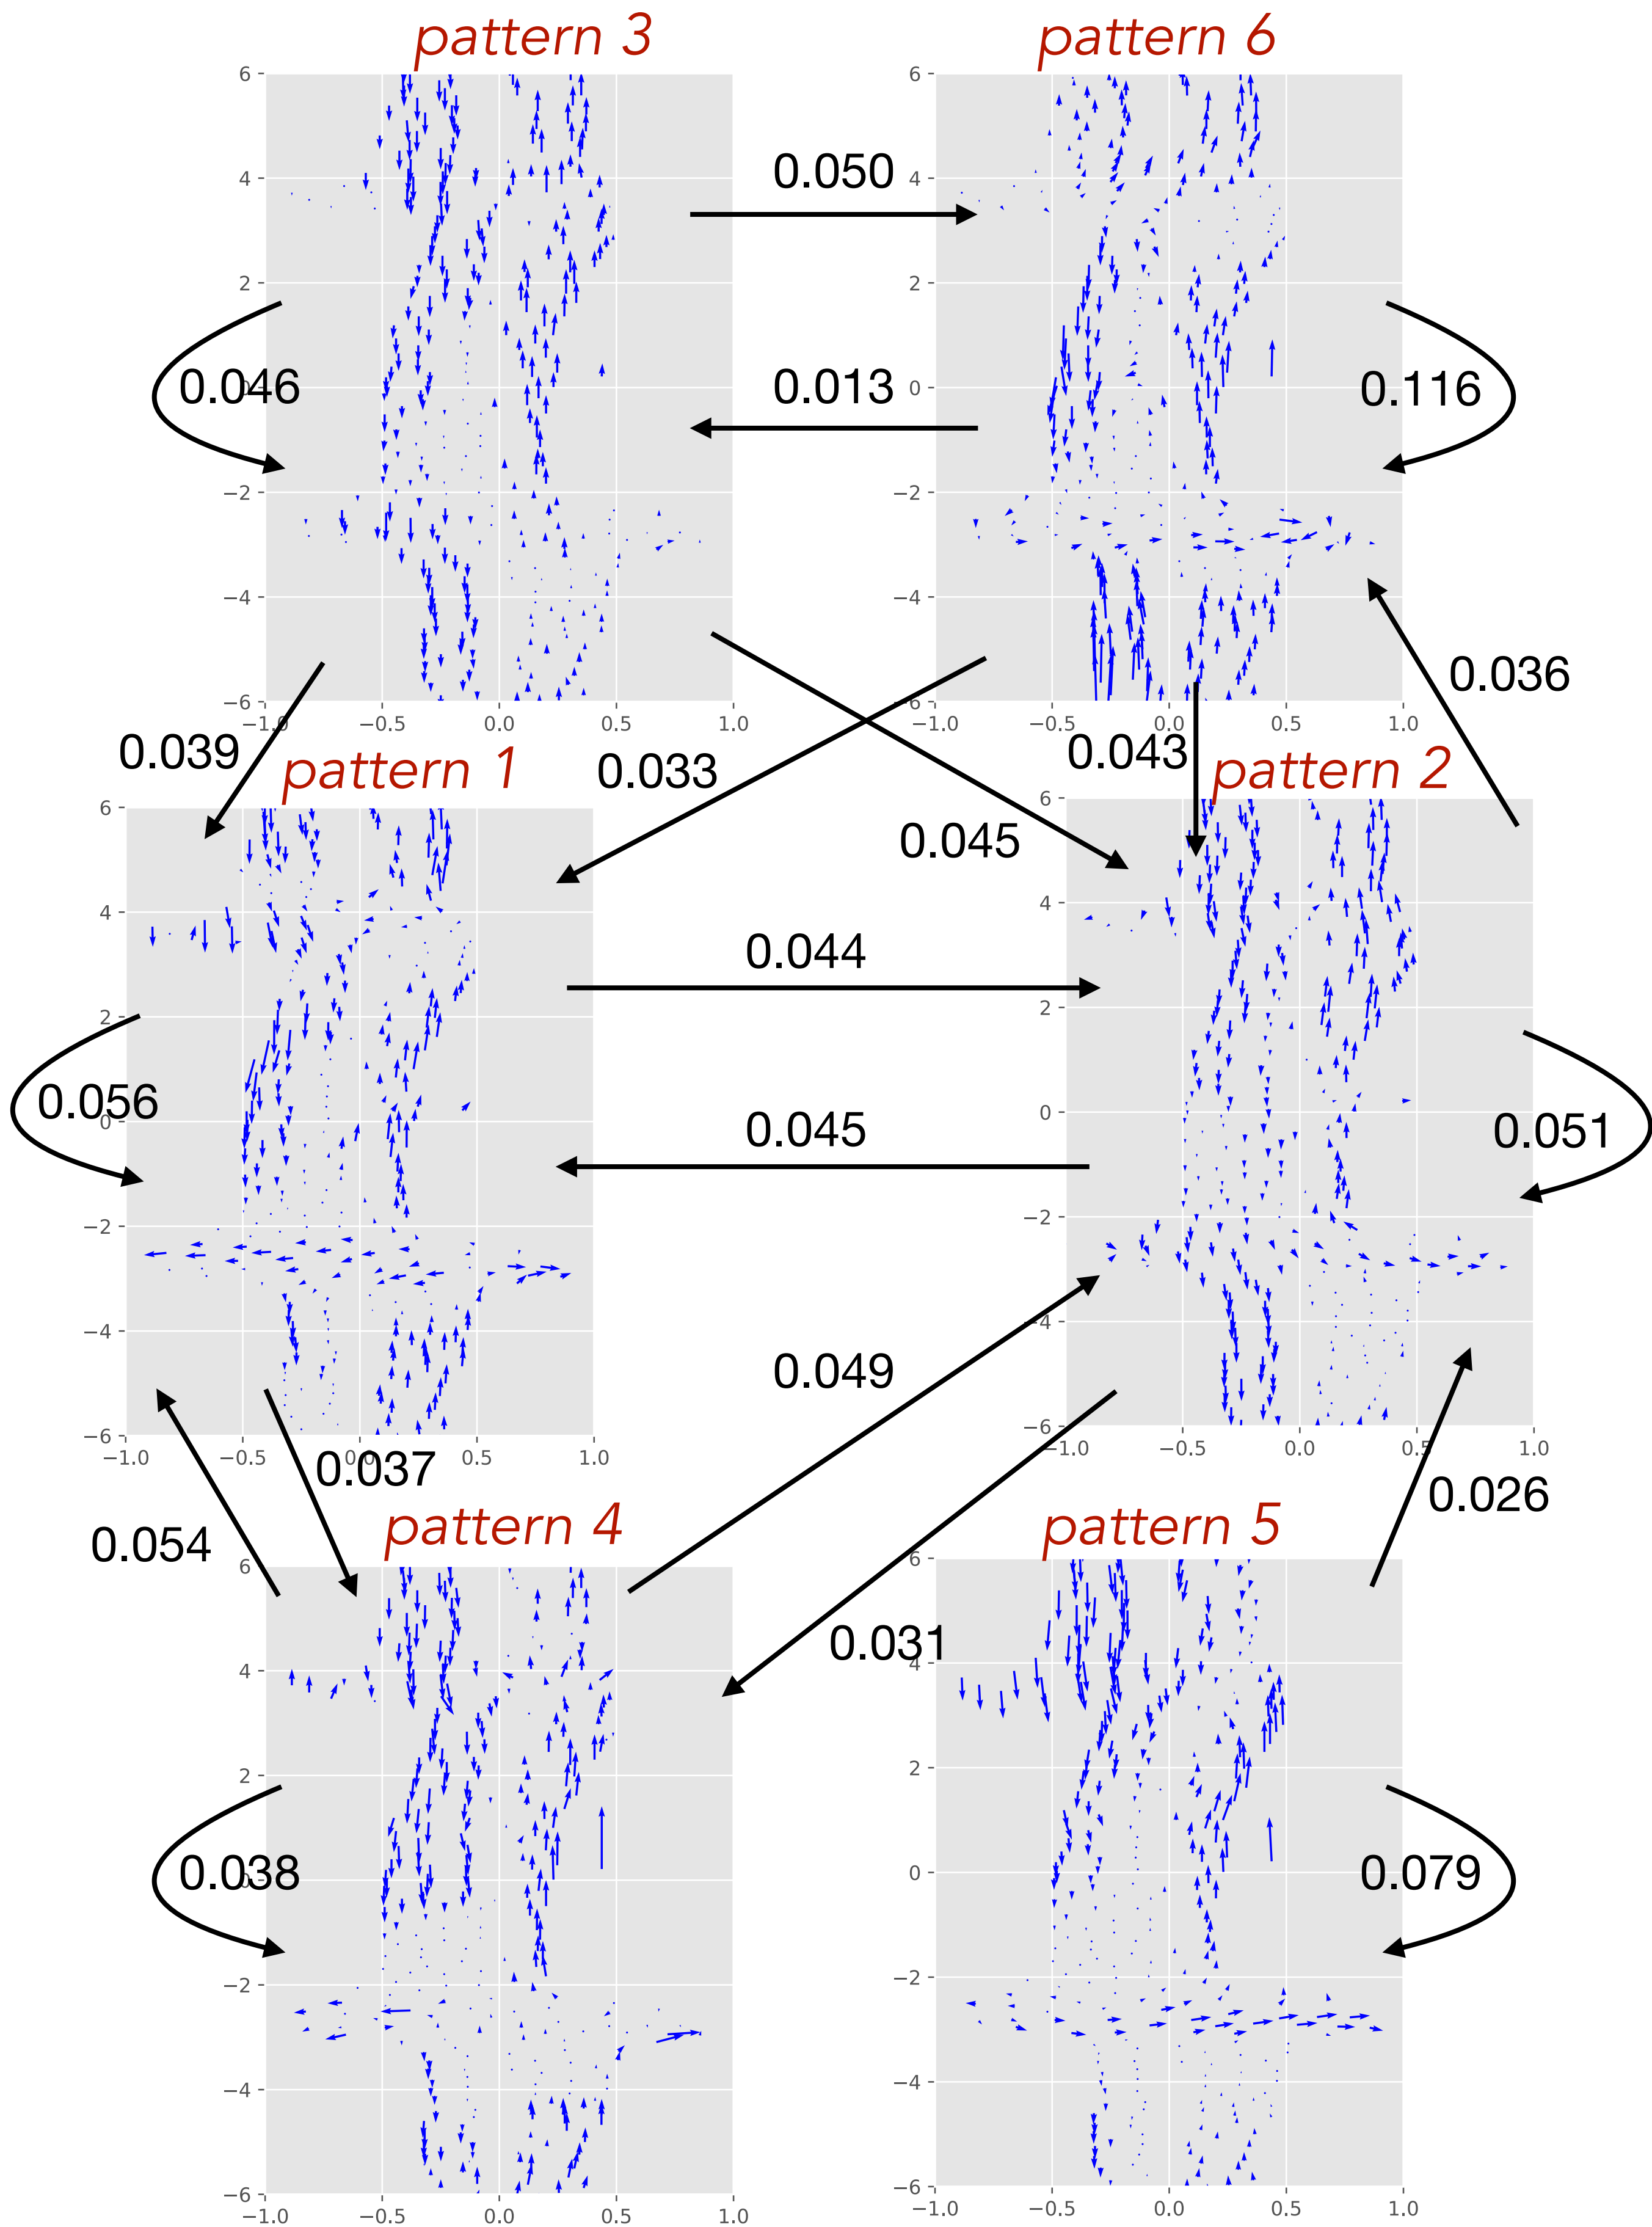

Supplement: supplementary_material [file attachment]

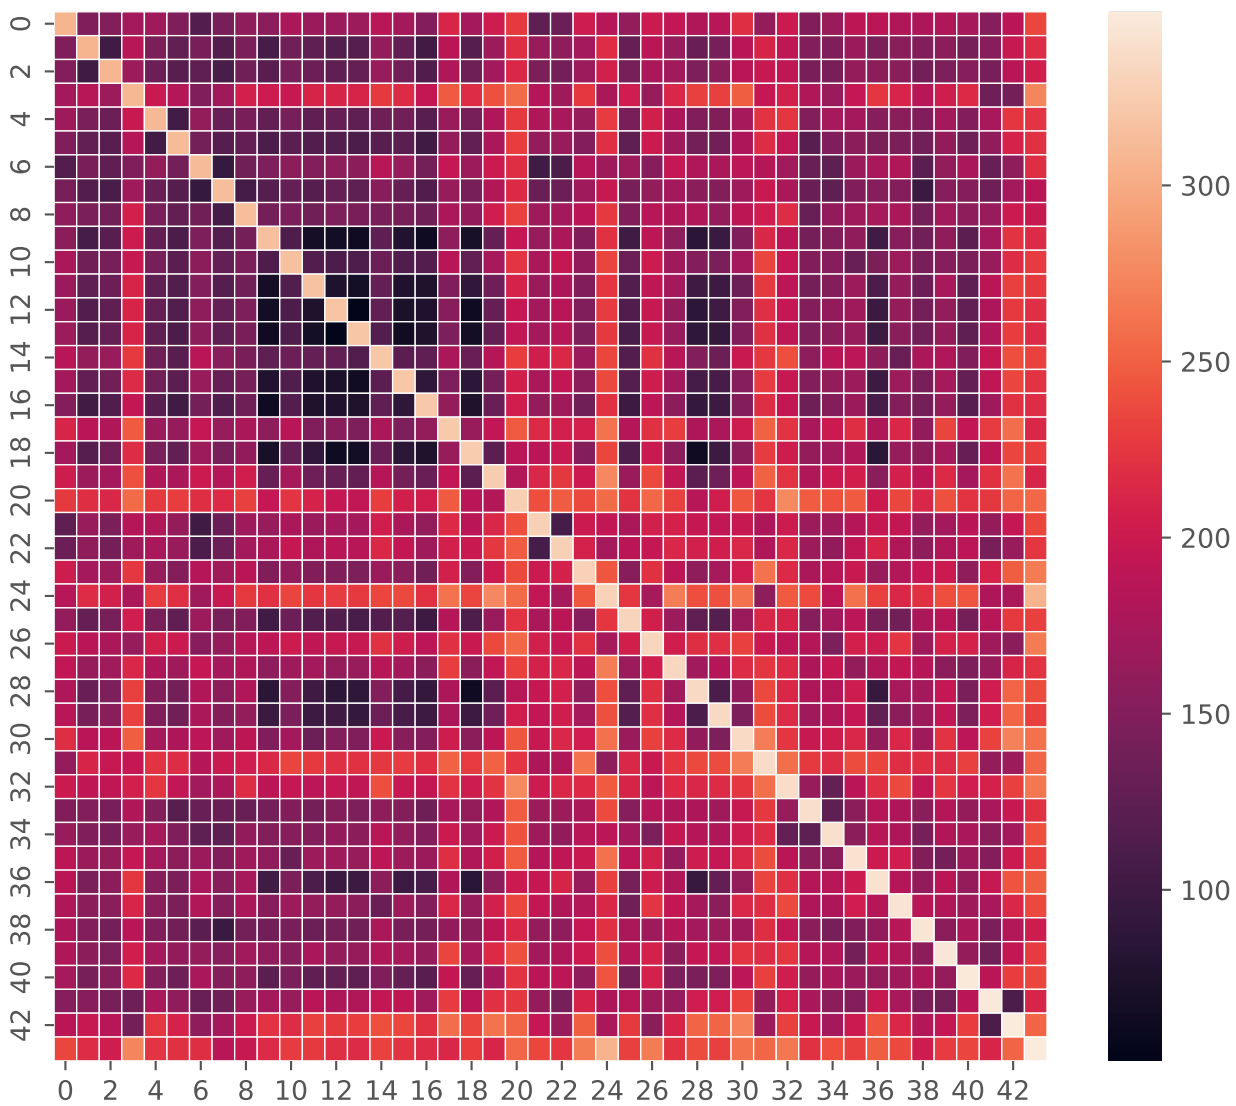

Supplement: supplementary_material [file attachment]

scores training

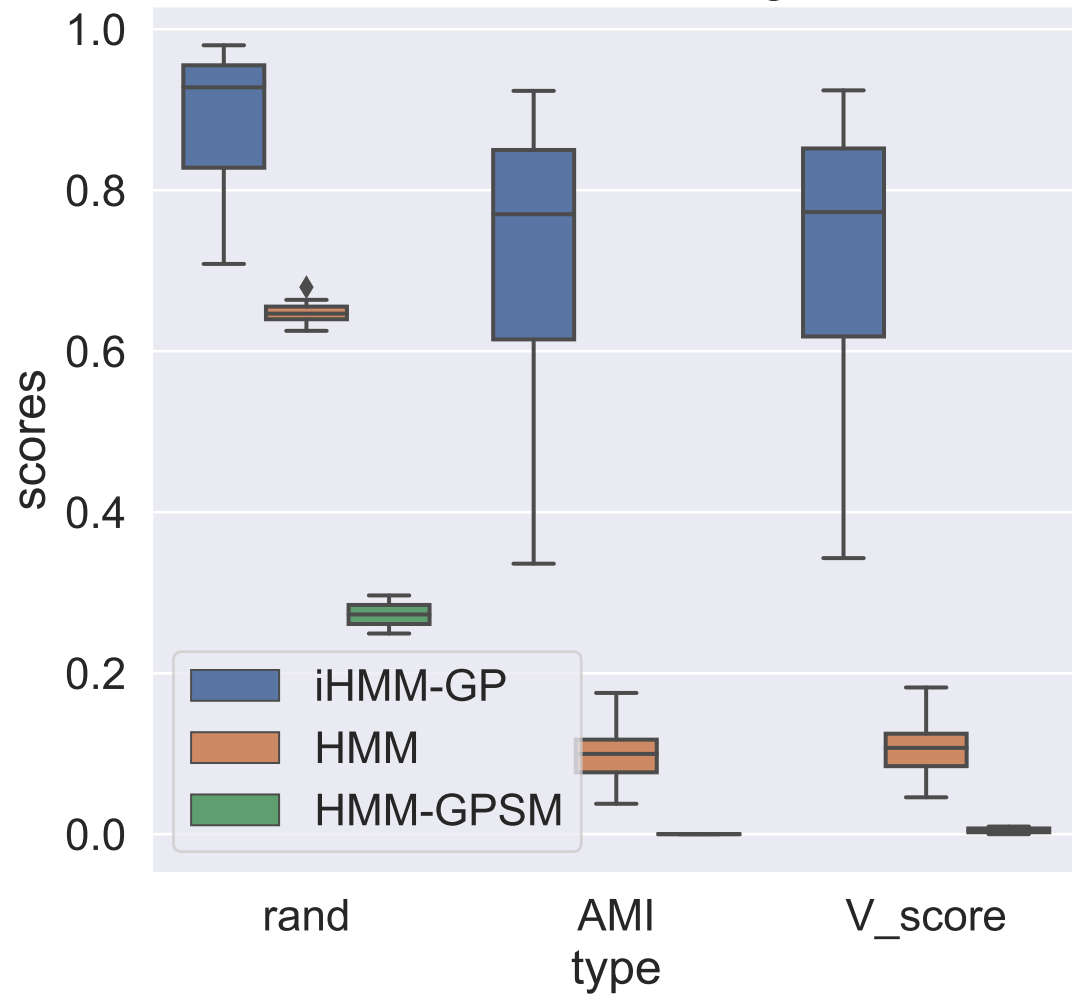

scores test

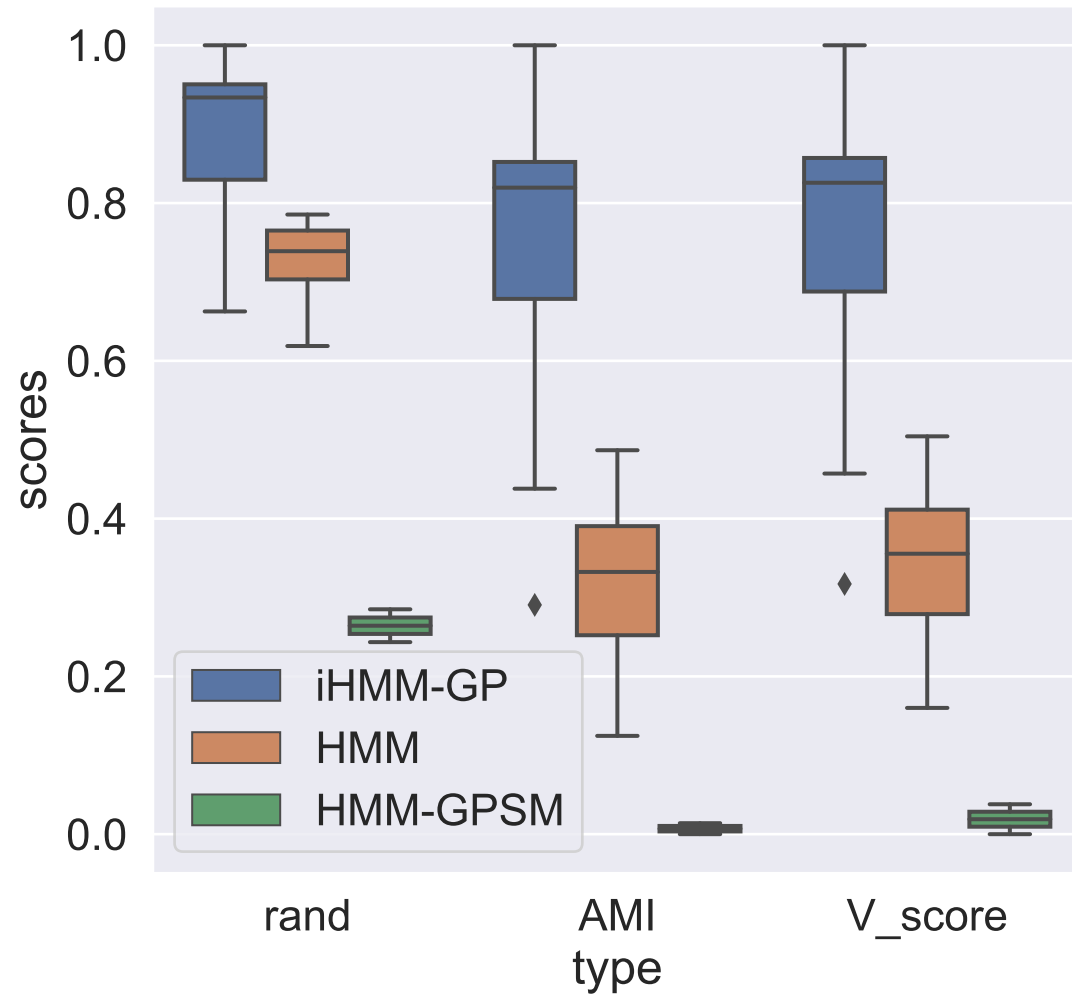

Supplement: supplementary_material [file attachment]

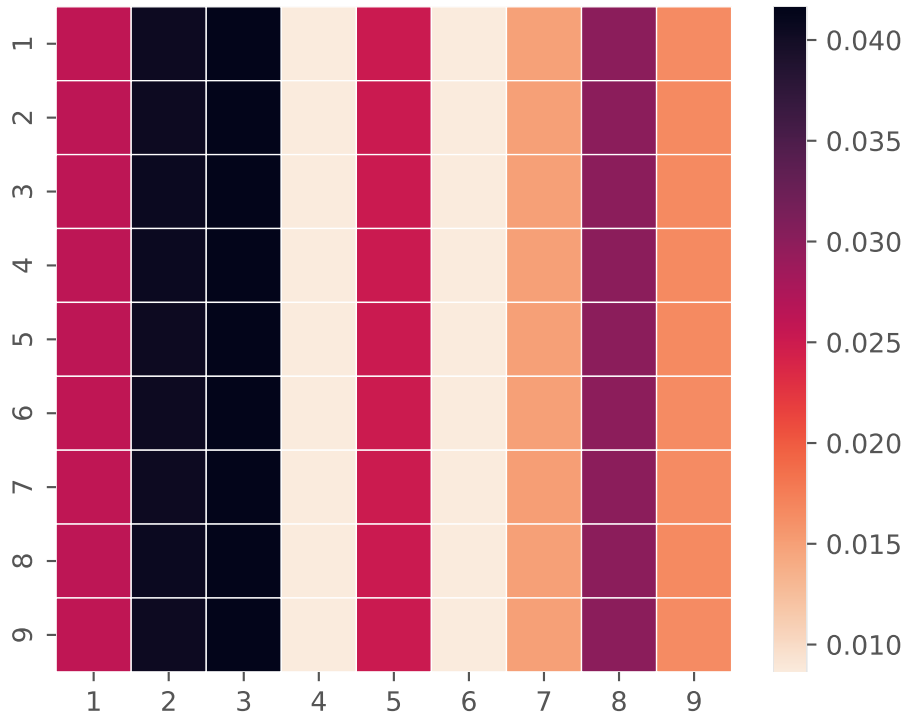

Supplement: supplementary_material [file attachment]

no. components

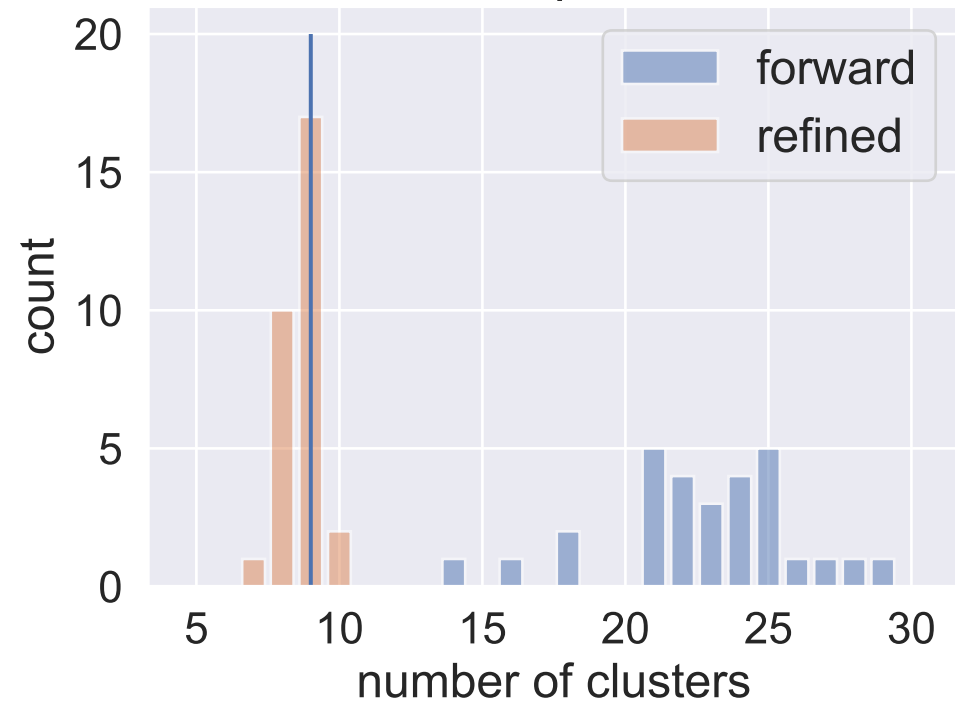

scores

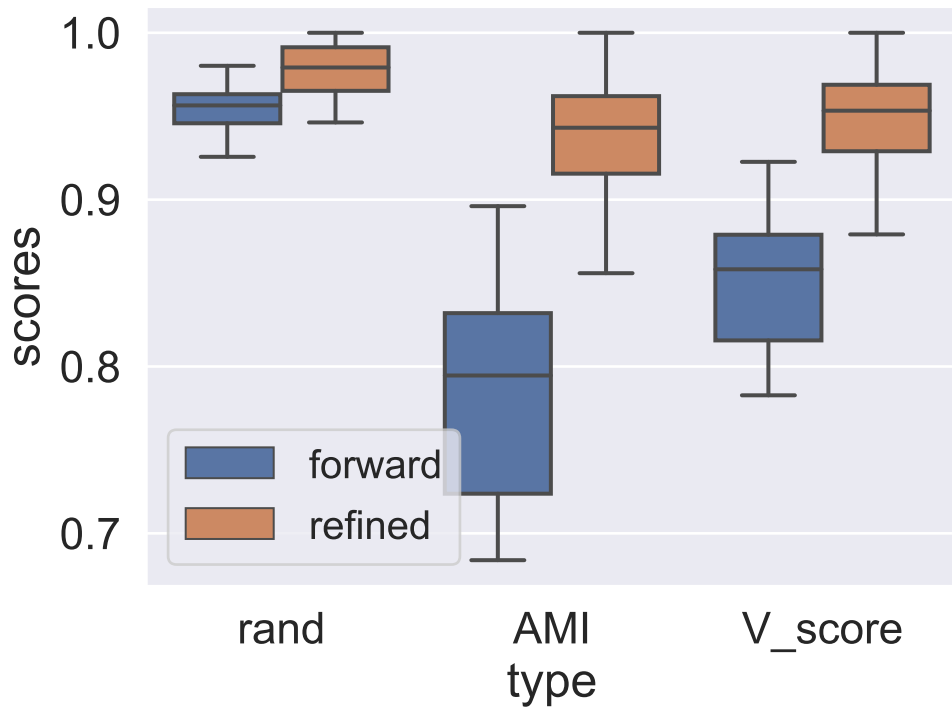

Supplement: supplementary_material [file attachment]

Eg 1:  $t=3872$

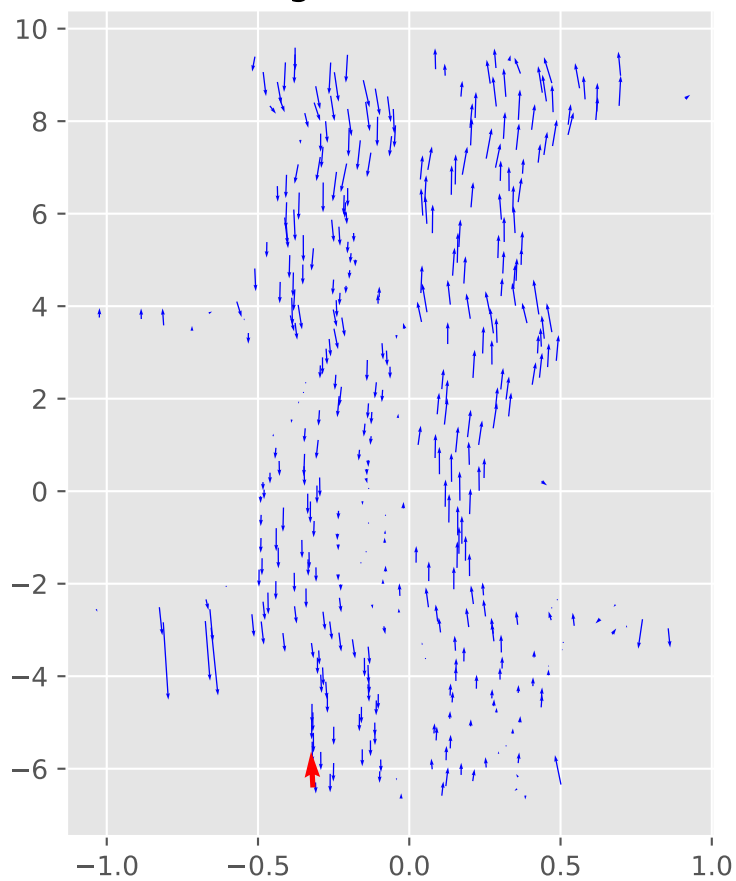

Eg 2:  $t=1699$

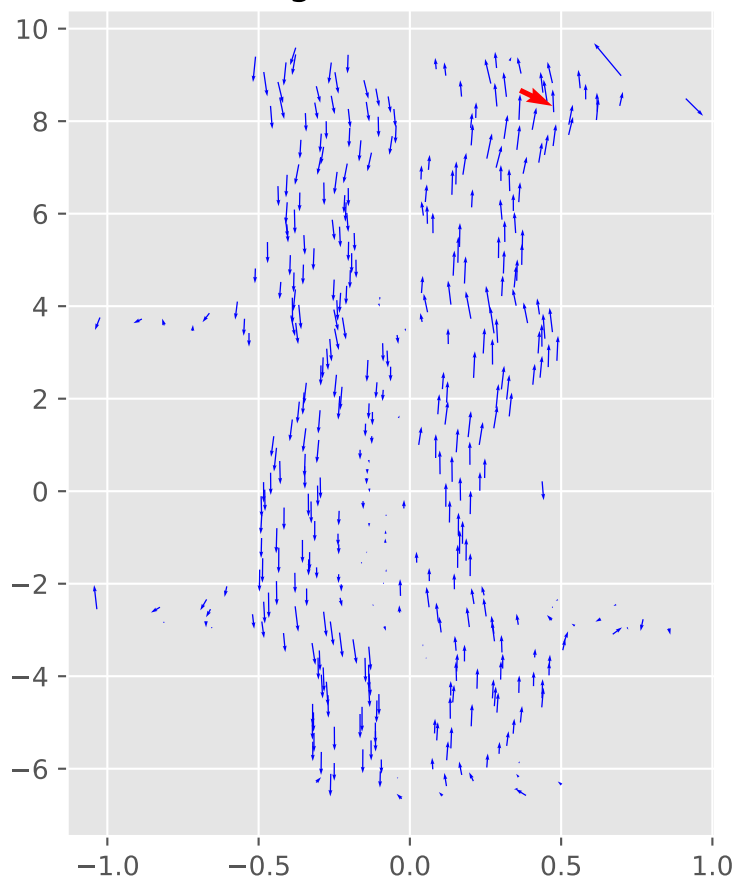

Eg 3:  $t=2875$

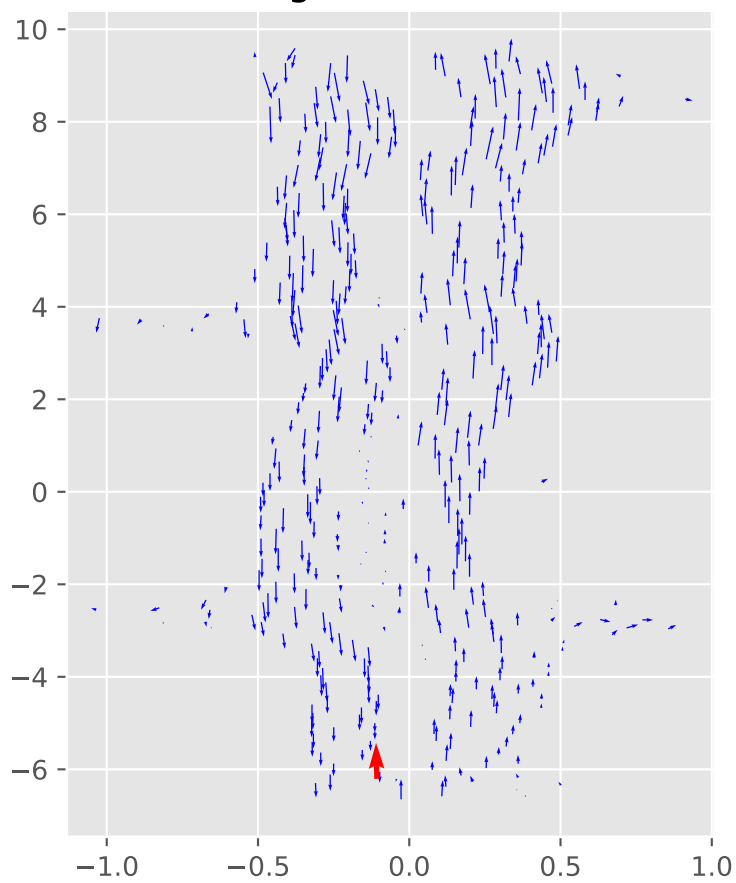

Eg 4:  $t=1754$

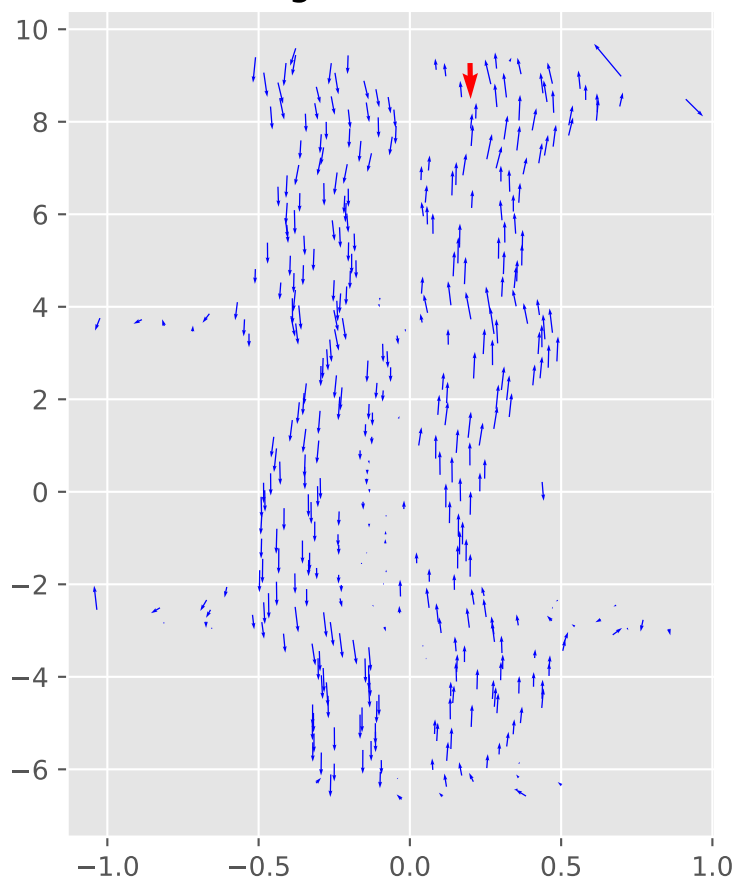

Supplement: supplementary_material [file attachment]

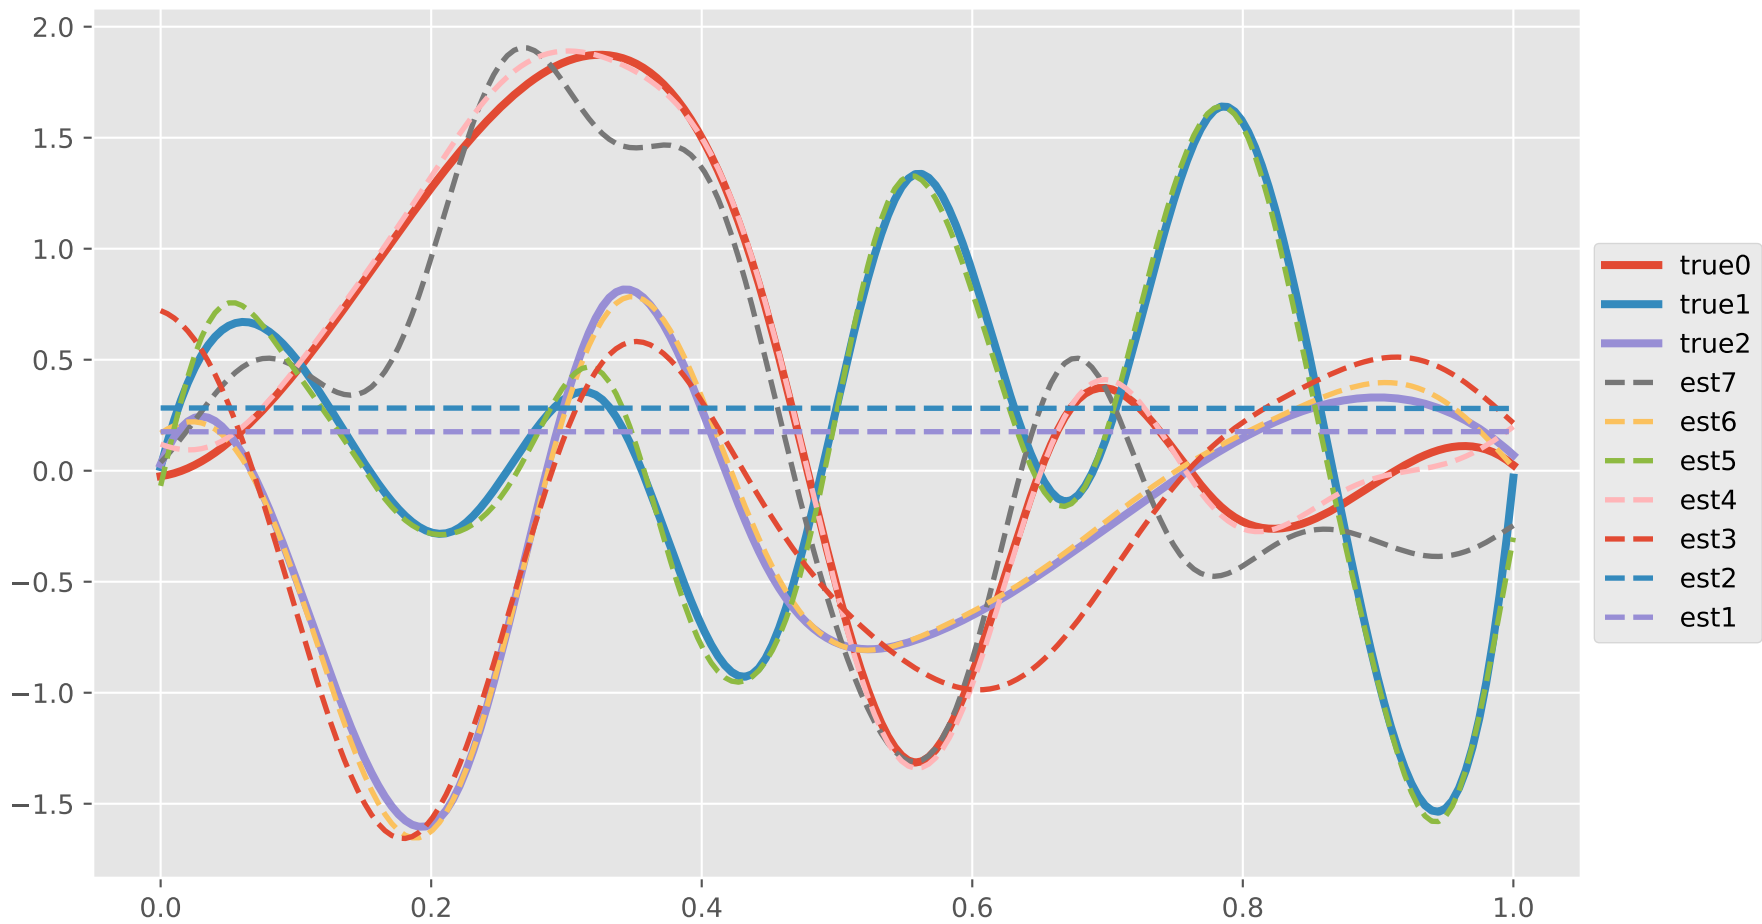

Supplement: supplementary_material [file attachment]

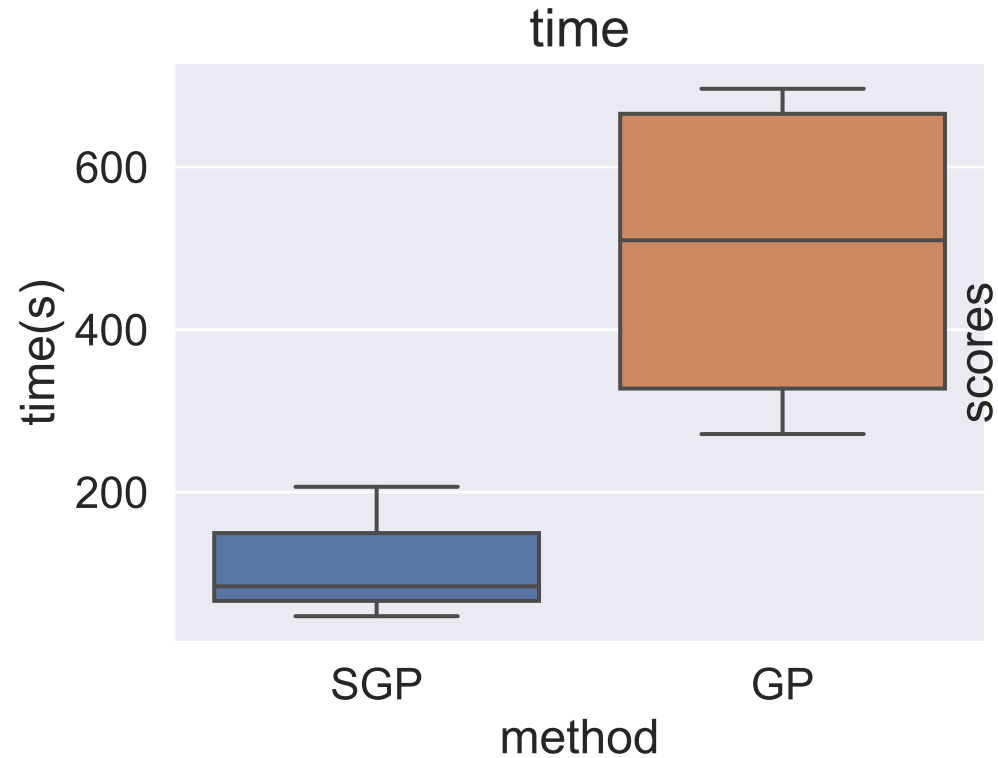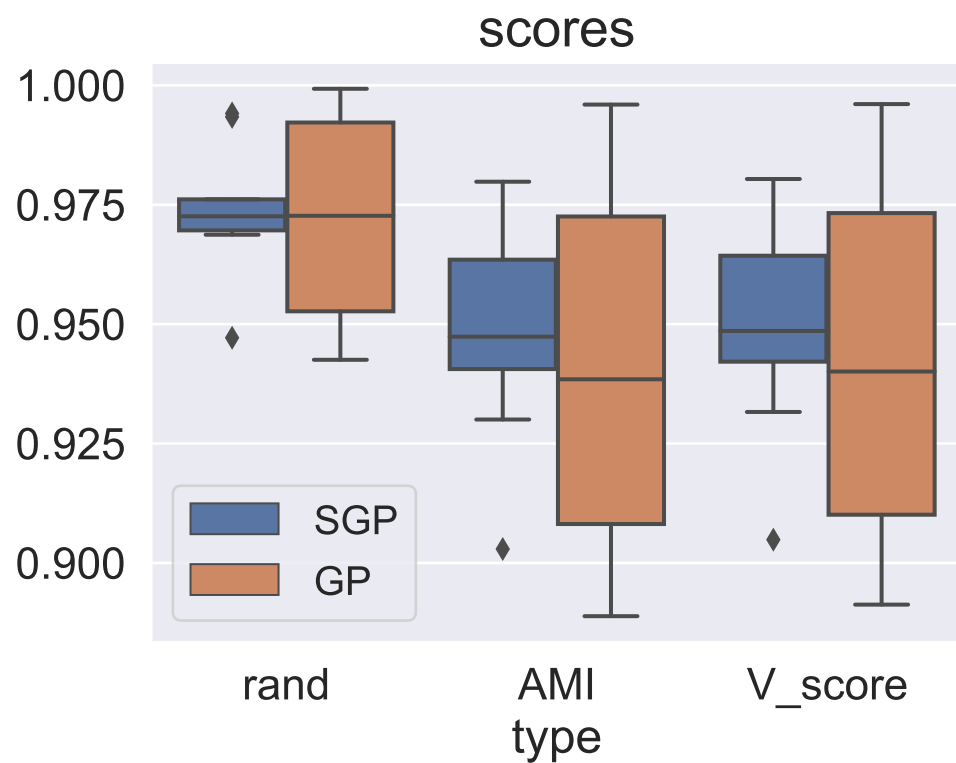

Supplement: supplementary_material [file attachment]

inf norm

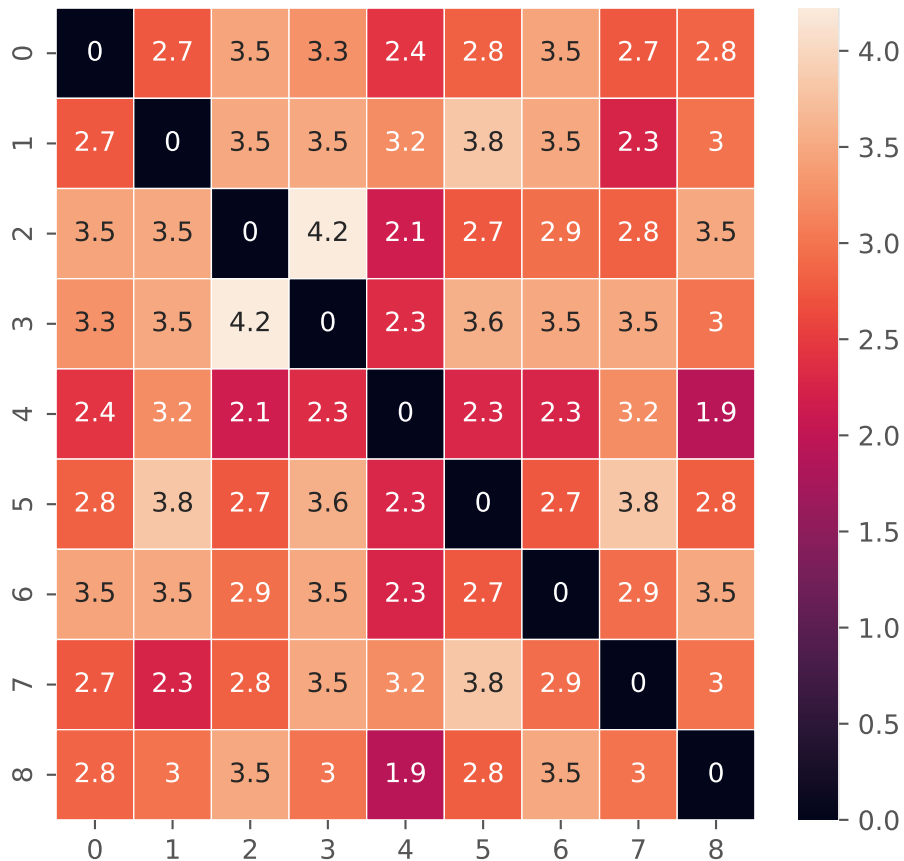

L2 norm

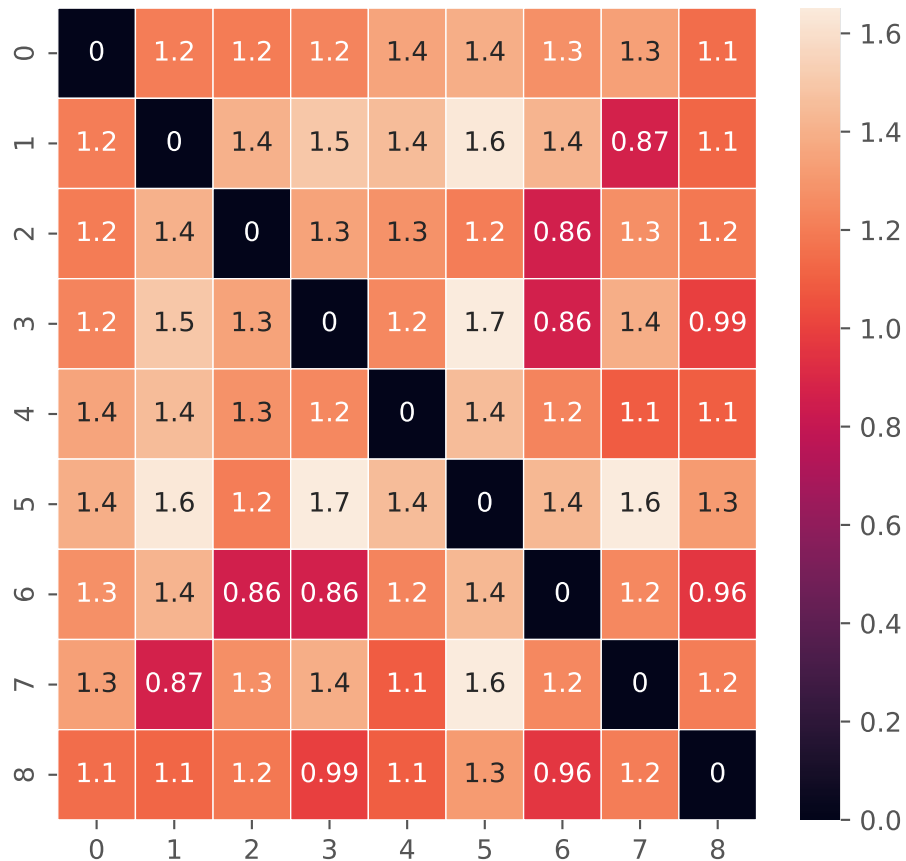

Supplement: supplementary_material [file attachment]

scores - iHMM parameters

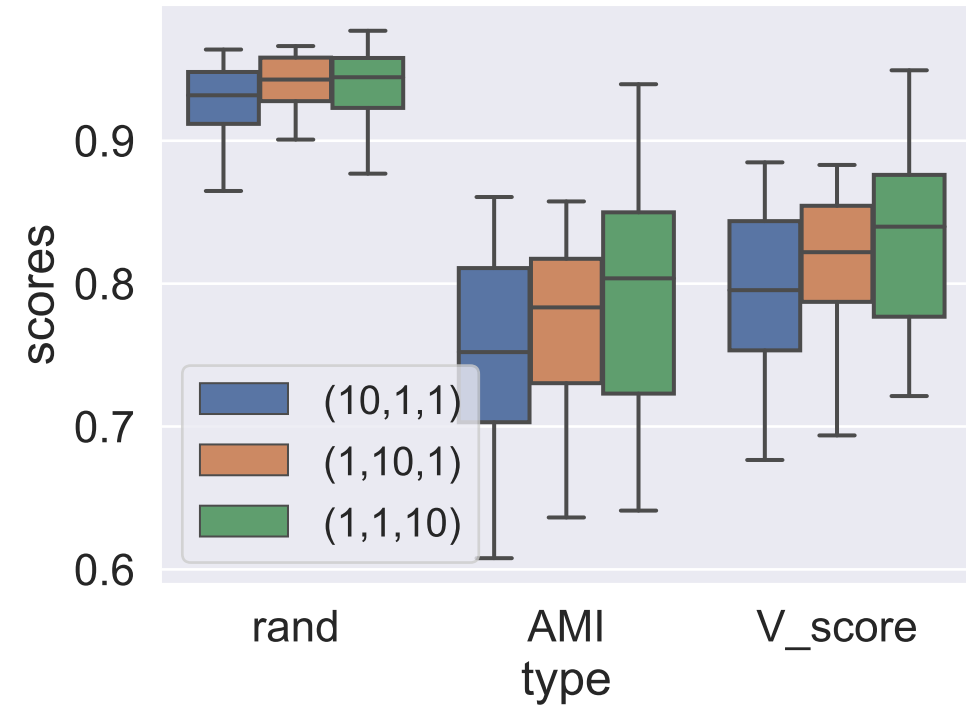

scores -  $n_0$

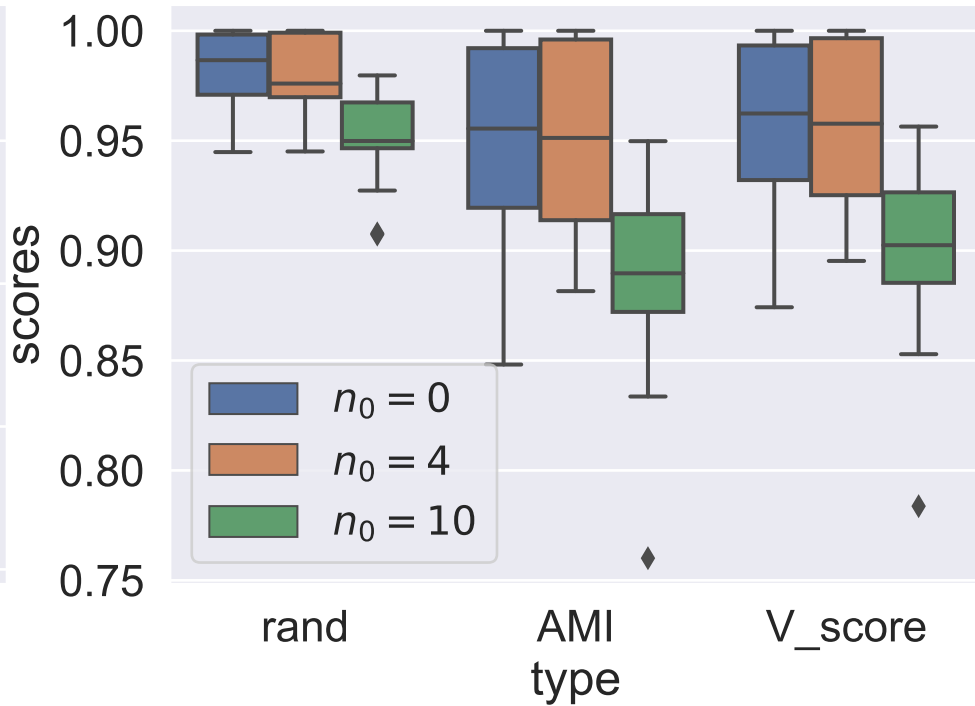

Supplement: supplementary_material [file attachment]
